# Supplementary material for: ESE3/EHF Controls Epithelial Cell Differentiation and Its Loss Leads to Prostate Tumors with Mesenchymal and Stem-like Features
Source: Oxford University Press journal article supplement (doi:10.1158/0008-5472.can-12-0212), 2012-04-14
Supplement: 00085472can120212-sup-f1-8_432k.pdf [file 00085472can120212-sup-f1-8_432k.pdf]

### TMA-VARESE COHORT-1

|                           | TOTAL SAMPLES<br>#50 |            |
|---------------------------|----------------------|------------|
| GLEASON SCORE             | Number               | Percentage |
| ≤ 6                       | 16                   | 32%        |
| = 7                       | 17                   | 34%        |
| >7                        | 17                   | 34%        |
| TUMOR STAGE               |                      |            |
| ≤ T2C                     | 28                   | 56%        |
| T3A-B                     | 21                   | 42%        |
| T3C-T4                    | 1                    | 2%         |
| NODE STATUS               |                      |            |
| N0                        | 42                   | 84%        |
| N1                        | 8                    | 16%        |
| PSA (ng/ml)<br>PRE-SURGEY |                      |            |
| ≤ 10                      | 32                   | 64%        |
| 11 to 20                  | 13                   | 26%        |
| > 20                      | 5                    | 10%        |

### TMA-BERN COHORT-2

|                           | TOTAL SAMPLES<br>#174 |            |
|---------------------------|-----------------------|------------|
| GLEASON SCORE             | Number                | Percentage |
| ≤ 6                       | 120                   | 69%        |
| = 7                       | 30                    | 17%        |
| >7                        | 24                    | 14%        |
| TUMOR STAGE               |                       |            |
| ≤ T2C                     | 83                    | 48%        |
| T3A-B                     | 75                    | 43%        |
| T3C-T4                    | 16                    | 9%         |
| NODE STATUS               |                       |            |
| N0                        | 173                   | 99%        |
| N1                        | 1                     | 1%         |
| N2                        | 0                     | 0%         |
| PSA (ng/ml)<br>PRE-SURGEY |                       |            |
| ≤ 10                      | 64                    | 37%        |
| 11 to 20                  | 60                    | 34%        |
| > 20                      | 50                    | 29%        |

#### Supplementary Figure 1

Histopathological and clinical parameters of primary prostate cancer patients in the two patient cohorts evaluated by TMAs.

## Supplementary Figure 2

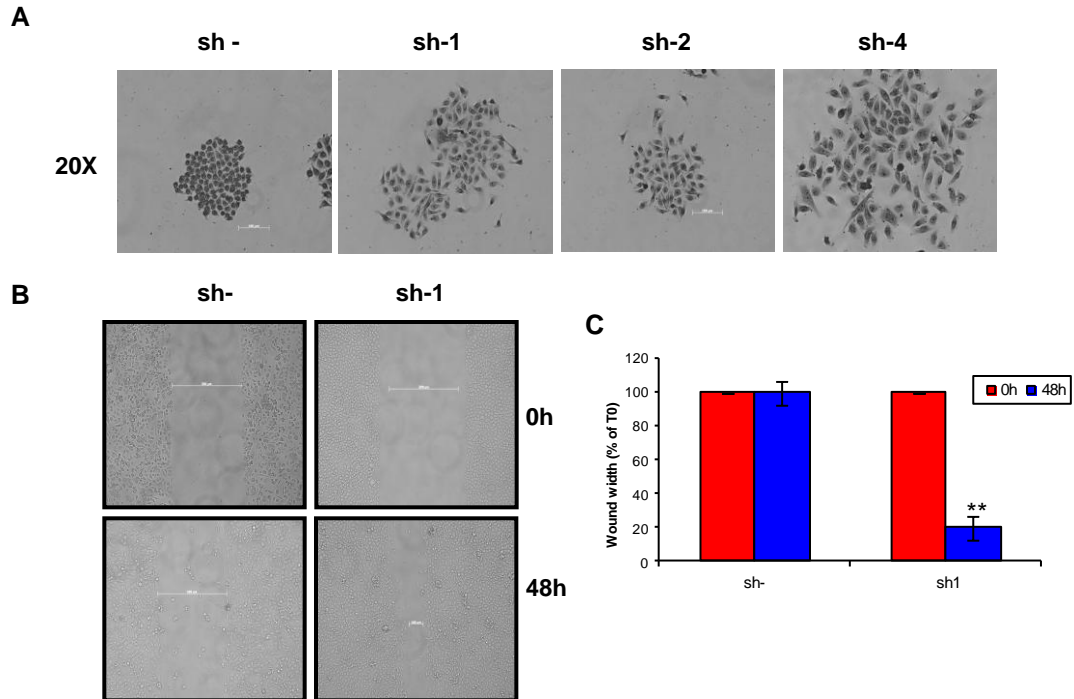

### Supplementary Figure 2

**ESE3/EHF knockdown induces epithelial to mesenchymal transition.** (A) Morphological changes induced by stable ESE3 knockdown by shRNA in RWPE-1 cells evaluated by phase-contrast microscopy. (B) Increased cell migration in ESE3<sup>kd</sup>- RWPE-1 (sh1) cells compared to RWPE-1 control (sh-) cells in scratch-wound healing assay. (C) Wound width as percentage at time 0 from triplicate experiments. \*\*P<0.01.

## Supplementary Figure 3

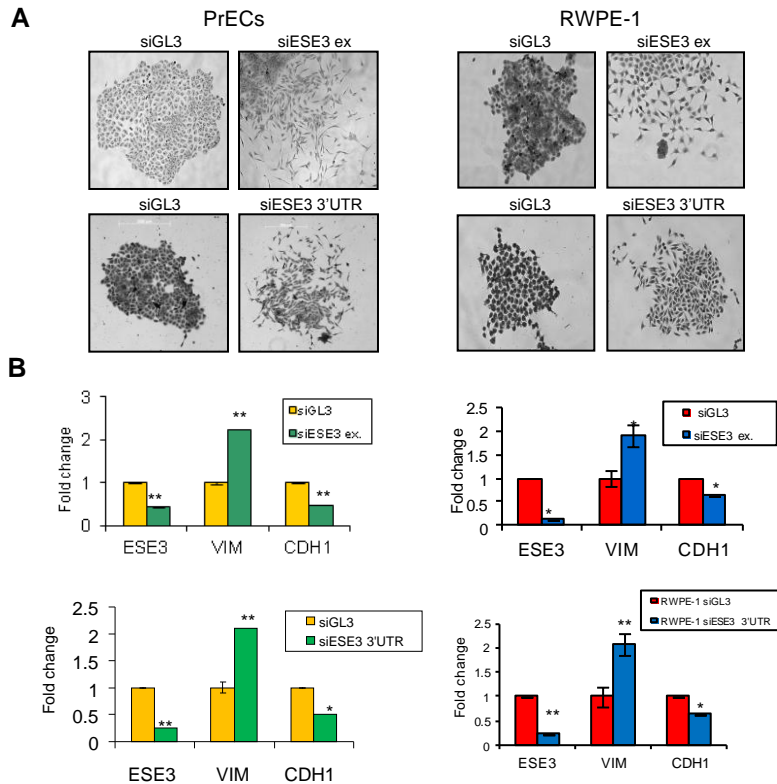

### Supplementary Figure 3

**Transient downregulation of ESE3/EHF induces a mesenchymal phenotype.** (A) Morphological changes induced by transient ESE3 knockdown with ESE3 targeting siRNAs (siESE3ex and siESE3 3'UTR) in PrECs and RWPE-1 cells evaluated by phase-contrast microscopy. (B) ESE3, Vimentin (VIM) and CDH1 RNA level following transient ESE3 knockdown in PrECs and RWPE-1 cells evaluated by QRT-PCR. P values were determined using *t*-test. \* $P < 0.05$ ; \*\*,  $P < 0.01$ .

## Supplementary Figure 4

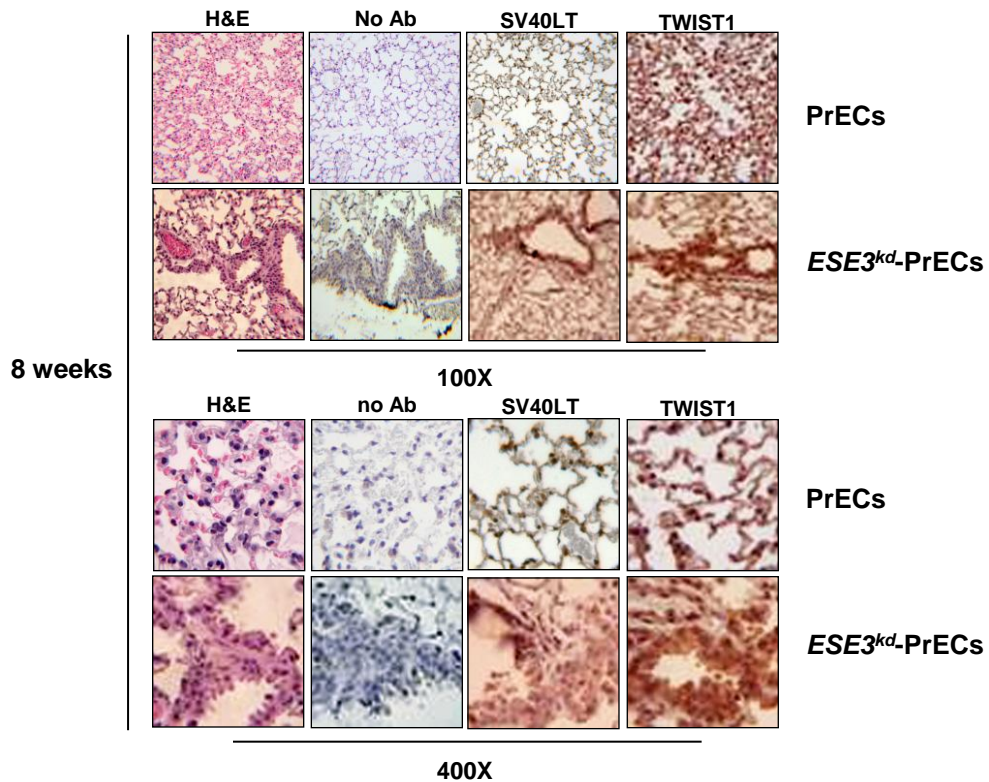

### Supplementary Figure 4

**In vivo formation of lung metastasis.** Control and *ESE3<sup>kd</sup>*-PrECs cells were inoculated by tail vein injection into immunodeficient mice (n=4/group). Mice were sacrificed at 8 weeks to perform histological analysis of multiple lung sections following H&E staining and immunostaining for SV40 large T antigen. Representative sections of the lungs of mice injected with control and *ESE3<sup>kd</sup>*-PrECs cells and examined after 8 weeks are shown.

## Supplementary Figure 5

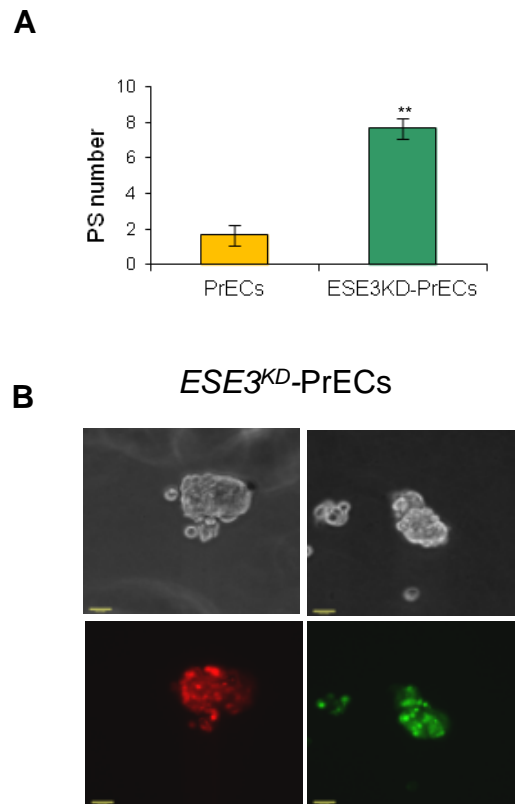

### Supplementary Figure 5

**Prostato-sphere formation by prostate epithelial cells.** (A) Sphere-forming assay under limiting dilution conditions. Cells were plated in 96-well plates and prostato-spheres were counted after 7-10 days. (B) Phase-contrast (upper panels) and fluorescence microscopy (lower panels) images of prostato-spheres of ESE3<sup>kd</sup>-PrECs. Cells were stained separately with either a green or red fluorescent dye and then mixed prior to the sphere-forming assay. \*\*, P<0.01.

## Supplementary Figure 6

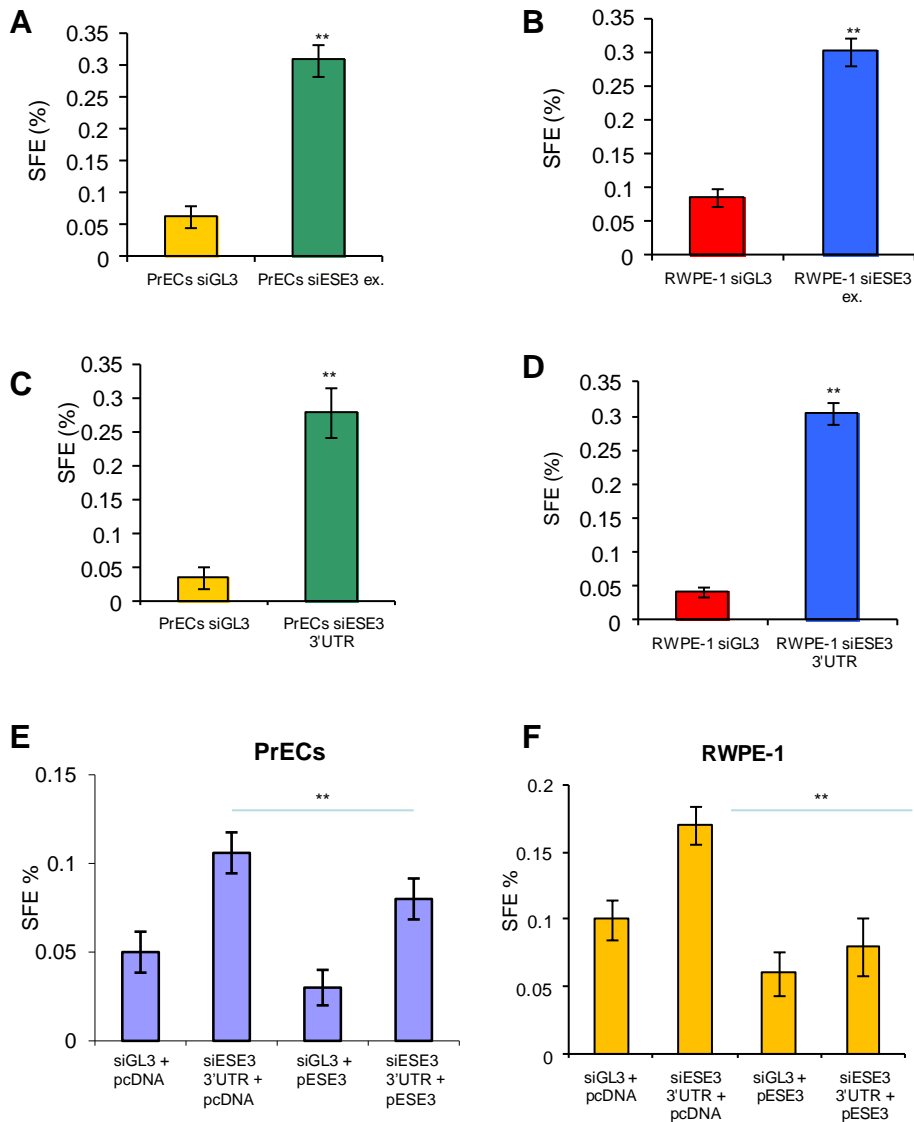

### Supplementary Figure 6

**Transient downregulation of ESE3/EHF in PrECs and RWPE-1 cells induces stem-like properties.** (A-B) Prostato-sphere formation following transient ESE3/EHF knockdown with siRNA targeting exon 2, siESE3ex, in PrECs and RWPE-1 cells. (C-D) Prostato-sphere formation following transient ESE3/EHF knockdown with the siRNAs targeting the 3'UTR. (E-F) Prostato-sphere assay after ESE3/EHF knockdown with 3'UTR siRNAs and concomitant transfection of an ESE3/EHF expression vector or control pcDNA in PrECs and RWPE-1. \*\*,  $P < 0.01$ .

## Supplementary Figure 7

**A**

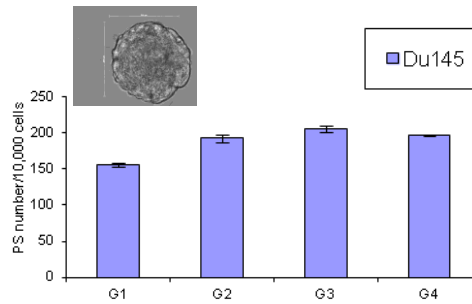

**B**

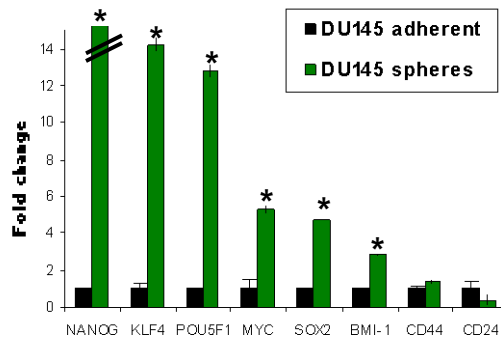

### Supplementary Figure 7

**Prostato-sphere formation and stem-like properties in DU145 cells.** (A) In vitro sphere-forming and self-renewal of DU145 cells. (B) Expression of cancer stem cell genes in adherent cells and prostato-spheres of DU145 cells determined by QRT-PCR. P values were determined using t-test. \*P<0.05; \*\*, P<0.01.

## Supplementary Figure 8

### Survival analysis

| ESE3 STAIN              | N total | N. events | Troncated | %     |
|-------------------------|---------|-----------|-----------|-------|
| Score = 0-1(weak/Neg)   | 156     | 48        | 108       | 69.2% |
| Score = 2 (Normal-like) | 18      | 1         | 17        | 94.4% |
| Global                  | 174     | 49        | 125       | 71.8% |

### Biochemical relapse analysis

| ESE3 STAIN              | N total | N. events | Troncated | %     |
|-------------------------|---------|-----------|-----------|-------|
| Score = 0-1(weak/Neg)   | 153     | 119       | 34        | 22.2% |
| Score = 2 (Normal-like) | 18      | 10        | 8         | 44.4% |
| Global                  | 171     | 129       | 42        | 24.6% |

### Gleason score distribution

| GLEASON SCORE | TOTAL % | ESE3 score weak/Neg | ESE3 score Normal-like |
|---------------|---------|---------------------|------------------------|
| ≤6            | 69%     | 106 (68%)           | 13 (72%)               |
| 7             | 17%     | 27 (18%)            | 2 (11%)                |
| ≥8            | 14%     | 22 (14%)            | 3 (17%)                |

### Supplementary Figure 8

**Overall survival and PSA biochemical relapse in prostate cancer patients.** Tables show the data relative to the patients included in the analysis described in Figure 8. Gleason score distribution was not statistically different between the two groups.
