# Supplementary material for: ESE3/EHF Controls Epithelial Cell Differentiation and Its Loss Leads to Prostate Tumors with Mesenchymal and Stem-like Features
Source: Oxford University Press journal article supplement (doi:10.1158/0008-5472.can-12-0212), 2012-04-14
Supplement: 00085472can120212-sup-t5_xls_135k.xls [file 00085472can120212-sup-t5_xls_135k.xls]

## Sheet: Sheet1
Supplementary Table 5. Genes up- and down- regulated in ESE3low tumours compared to all tumours (Q<0.05)
Wallace dataset
GENES UPREGULATED IN ESE3_Low vs All					GENES DOWNREGULATED IN ESE3_Low vs All
gene name	qvalue>0.05				gene name	qvalue>0.05
SGCD	6.65484e-05				LGALS8	6.65484e-05
RHOBTB1	0.000175929				GPD2	0.000109316
C14orf139	0.000208074				LGALS8	0.000109316
SPARC	0.00033359				ALG13	0.000344396
PRKAR2B	0.000407187				PATZ1	0.000344396
COL5A1	0.000441713				DLG1	0.00036812
TLE4	0.000851825				PDLIM5	0.00036812
FOXF2	0.000851825				RORC	0.000441713
COL15A1	0.000972566				TMEM63A	0.000494132
COL1A1	0.00100734				CEACAM1	0.000735136
STRA6	0.00100734				ST6GAL1	0.000741832
SPARC	0.00102668				CSGALNACT1	0.000877836
PIP4K2A	0.001105				CEACAM1	0.000972566
NAP1L3	0.001105				LGALS8	0.000972566
FBN1	0.001105				C10orf118	0.000988717
SYNPO	0.001105				RGS17	0.00100734
COL4A1	0.001105				TM4SF1	0.00100734
STC2	0.00122994				PTP4A1	0.00100845
RGS5	0.00122994				ITPR3	0.001105
SYT11	0.00124969				PKP2	0.001105
RCN3	0.00124969				RRAGD	0.001105
PLXND1	0.00124969				SH3YL1	0.001105
PLXND1	0.00125011				LAMC2	0.00122994
COL5A2	0.00125011				TM9SF4	0.00124969
RIMS3	0.00125011				PPP2R2A	0.00124969
FBLN5	0.00129608				PDP1	0.00125011
COL1A2	0.00129608				---	0.00135545
ENTPD1	0.00140878				GSR	0.00140878
PPIC	0.00140878				EXPH5	0.00140878
IL15	0.00140878				ERG	0.00141656
CXCL12	0.00141138				FAM134B	0.00141656
PPIC	0.00141656				ANK3	0.00141656
TFPI	0.00141656				CPD	0.00141656
ELN	0.00141656				SLC35A2	0.00141656
PRKCDBP	0.00141656				GLS2	0.00141656
ADCY7	0.00147665				MYO6	0.00141656
FSTL3	0.0015684				UBE2J1	0.00146537
TNFAIP8	0.00160943				CEACAM1	0.00155749
TNFAIP8	0.00174446				CREB3L1	0.0015684
PDGFRB	0.00174446				0	0.00160878
SEPT11	0.00174446				CEACAM1	0.00174446
PCSK5	0.00174446				TNFRSF11A	0.00174446
CDH2	0.00174446				CELF1	0.00174446
RGS5	0.00174446				CYP1B1	0.00174446
IGFBP6	0.00174446				RRAGD	0.00174446
CAND2	0.00174446				PATZ1	0.00174446
LOXL1	0.00174446				ITGA6	0.00174446
KCTD12	0.00174446				MALT1	0.00175816
C1R	0.00174446				TM4SF1	0.00175816
PCOLCE	0.0018365				EIF2S3	0.00191892
TBX2	0.00186969				MALT1	0.00198049
GPSM2	0.00192835				GPR56	0.00198823
CALHM2	0.00194908				ERG	0.00198823
TLN2	0.00194908				ZNF614	0.00206914
COLEC11	0.00197689				SH2D3A	0.00206914
GFOD1	0.00197879				VPS13D	0.00206914
TNFRSF1B	0.00198823				PIGN	0.00206914
SEPT11	0.00198823				NUDT4	0.00207249
SERPINE2	0.00206914				MARCH6	0.00209582
CELF2	0.00206914				TFAP2A	0.00209582
CDH2	0.00206914				RAB11FIP1	0.00209582
LAMA2	0.00206914				TRIM2	0.00209582
0	0.00206914				THSD4	0.00209582
PNMA1	0.00209582				CDH1	0.00216269
ADAMTS5	0.00209582				KCNN4	0.00216359
SYNC	0.00209582				DCAF16	0.00216359
CLEC3B	0.00209582				PER2	0.00228607
RCAN2	0.00216359				SORL1	0.00228977
LOC100132214 /// RASA4 /// RASA4B /// RASA4P	0.00222045				EHF	0.00230421
WFS1	0.00228977				MTMR3	0.00230421
DCHS1	0.00228977				LIMD1	0.00230421
COL5A1	0.00228977				ITGB4	0.00234715
CELF2	0.00230421				HMGCS1	0.00234716
C1QTNF1	0.00234715				MALT1	0.00234716
0	0.00234715				SOX9	0.00234716
LTBP1	0.00234716				0	0.00234716
KCNMA1	0.00234716				NKAIN1	0.00234716
FILIP1L	0.00234716				SLC26A2	0.00234716
WNT5A	0.00238779				TLE1	0.00239283
RABGAP1L	0.00239002				MTMR3	0.00239283
WNT2	0.00239283				COBLL1	0.00239283
TRAF5	0.00239283				MYO6	0.00242587
DCHS1	0.00239283				FFAR2	0.00245323
ADAMTS2	0.00239283				C11orf71	0.0025479
GRK5	0.00239619				CTAGE9	0.0025503
SLC7A7	0.00248208				CLDN1	0.00263235
COL16A1	0.00256818				GRB7	0.00263235
COL4A2	0.00259532				FAM134B	0.00279331
COL3A1	0.00269146				GPRIN2	0.00279331
PLCL1	0.00272084				NUMA1	0.00286305
GPSM2	0.00276363				DSC2	0.00290465
EHD2	0.00277798				MYO6	0.00290465
WNT5A	0.00279331				PPAP2C	0.0029201
0	0.00283572				STEAP4	0.00292332
DFNA5	0.0028765				DNASE2B	0.00292332
HEY1	0.00290465				PDE8B	0.00292332
COL5A1	0.00291022				SLC37A4	0.00292332
NCAM1	0.00292332				VEGFA	0.00292332
C4orf31	0.00292332				CAB39L	0.00295173
0	0.00292332				FEV	0.00309012
---	0.00292332				NEK3	0.0031262
RASSF2	0.00292332				0	0.0031262
CLIC4	0.00292332				SLC12A2	0.0031262
MSN	0.00293181				CRISP2	0.0031262
TBX2	0.00293181				TM4SF1	0.00320297
FHL1	0.00295173				MARCKS	0.00320297
COL1A2	0.00307181				PLA2G7	0.00320297
COL3A1	0.00308053				FAM57A	0.00320297
WFDC1	0.00308206				CD46	0.00320297
COL6A3	0.00309012				SOX9	0.0032466
SLIT3	0.00312513				TRAF4	0.0032466
TBXA2R	0.00312513				HNMT	0.0032466
ANGPTL2	0.00312513				MPZL2	0.0032466
SYNGR1	0.00312513				SORL1	0.0032466
COL14A1	0.0031262				ACP6	0.0032466
AEBP1	0.0031262				CPD	0.0032466
IL16	0.0031262				0	0.0032466
COL3A1	0.0031262				NUDT4 /// NUDT4P1	0.0032466
COL6A1	0.00313336				ACSM3	0.0032466
COL5A2	0.00313336				F3	0.00334137
HEPH	0.00313336				NCRNA00115	0.00340212
CDC25B	0.00313336				GNAS	0.00341648
0	0.00314336				NFIB	0.00342462
DKK3	0.00318044				EGFR	0.00342462
IFI16	0.00318044				SLC7A8	0.00343421
RECK	0.00318044				ATP8A1	0.003448
AQP1	0.00320297				MAGED4 /// MAGED4B	0.00345834
DNM1	0.00320297				HIPK2	0.00345834
0	0.00320297				ARFGEF2	0.00345913
NES	0.00320297				LGALS8	0.0035967
KIT	0.00320297				IKBKB	0.00368652
EHD2	0.00320297				ITPR3	0.00373353
ADCY3	0.0032053				ZNF654	0.00373353
AK1	0.00320977				LRRC8B	0.00373353
MYBL1	0.0032466				DSG2	0.00381273
SPON1	0.0032466				ANXA3	0.00387451
COL1A1	0.0032466				BCL2L1	0.00387797
CTSC	0.0032466				MAP7	0.00389289
PCSK5	0.0032466				0	0.00393153
QSOX1	0.00325785				0	0.00397835
DPYSL2	0.00325785				AQP3	0.00399692
LAMA2	0.00325785				CD46	0.00399692
ZEB2	0.00326406				CHRM3	0.00399692
HSPB7	0.00327419				VEGFA	0.00409373
IGF2BP2	0.00327419				CD44	0.00409373
IFI16	0.00328499				GREM2	0.00413761
A2M	0.00329244				CBLC	0.00419085
TSPAN7	0.00332655				MAP7	0.00424539
NDN	0.00332655				BCAM	0.0042577
ELK3	0.0033366				PPP2R1B	0.00428585
NFASC	0.0033366				---	0.00432026
0	0.00334137				---	0.00433751
COL4A1	0.00338239				---	0.00436391
TCF7L1	0.00338239				TM4SF1	0.00437623
FYN	0.00341648				AQP3	0.00439969
MMP23A /// MMP23B	0.00342436				0	0.00456637
MAP1B	0.00342462				SNRNP70	0.00459574
TBC1D1	0.00342462				ACSM3	0.00466388
YWHAH	0.00342543				NET1	0.00471753
0	0.00343261				IL1R1	0.00471938
GMFG	0.00343421				SLC44A4	0.00473597
CCR5	0.003448				PSD4	0.00477253
CXCR7	0.003448				DEPDC6	0.00477253
HMHA1	0.00345834				TMC5	0.00482905
THSD7A	0.00347025				COL9A2	0.00483842
THY1	0.00355825				OGDHL	0.00483842
RAB31	0.00373605				RBM5	0.00491117
SPON1	0.00373629				TSPAN8	0.00494526
RASL12	0.00374423				GALC	0.00494526
DENND2A	0.00374423				NFKB2	0.00494526
CTPS	0.00380138				CCDC6	0.00494526
NT5DC2	0.00380138				AMD1	0.00509304
ANXA6	0.00380836				FLOT2	0.00509304
TBX4	0.00381222				TMEM40	0.00509911
C1S	0.00381222				EPHB3	0.00509911
FAT4	0.00381222				NUDT4 /// NUDT4P1	0.00509911
WIPF1	0.00381273				ERG	0.00510511
0	0.0038169				CLCN3	0.00510511
TBL1X	0.00387434				AK3L1	0.00510511
TIMP3	0.00387797				TRIB3	0.00510511
DST	0.00389289				PTP4A1	0.00511946
DST	0.00389366				RHOBTB3	0.00511946
STAB1	0.00393153				ZNF750	0.00511946
PSRC1	0.00393153				TGIF2	0.00514407
GPM6A	0.00393153				ADCY1	0.00519837
EML1	0.00393153				RAB4A	0.00529516
TMOD1	0.00393153				CA5B	0.00529516
FLJ10357	0.00393153				NUMA1	0.0053114
LDB2	0.00393153				LMAN1	0.00533496
PSTPIP1	0.00393153				SRRT	0.00536885
STAB1	0.00393714				DDI2 /// RSC1A1	0.00543665
ANK2	0.00396616				TOM1L1	0.00548448
CLU	0.00396616				PCDHGA3	0.00550587
VAMP5	0.00399692				---	0.00552632
CLU	0.00399692				FRAS1	0.0056594
NFASC	0.00399692				KCNK1	0.00571932
GIMAP6	0.00401659				TP63	0.00571932
S100A4	0.00403034				0	0.00571989
CALHM2	0.00405559				PIP5K1A	0.00583733
MAN1A1	0.00425516				ENTPD7	0.00583733
HEY1	0.0042577				GCNT2	0.00583733
SYT11	0.0042837				TSPAN12	0.00583966
SASH3	0.00430294				KIF13B	0.00583966
RAMP1	0.00437623				MUC3B	0.00593555
FLJ10357	0.00437623				TP63	0.00599126
VCAM1	0.00439969				ROD1	0.00599126
ZNF23	0.00443932				F5	0.00599126
ANGPTL2	0.00451459				SFRS6	0.00604742
ZNF536	0.00451459				0	0.00609243
ARHGEF6	0.00456637				ZNF613	0.00609807
0	0.00463017				PDLIM5	0.00613823
FRZB	0.0046457				0	0.00615298
GYPC	0.0046457				INO80B	0.00615988
LARGE	0.0046457				PRKCI	0.00615988
CCL21	0.0046457				GLTP	0.00615988
LPIN1	0.0046457				GM2A	0.00625322
LOC100286937 /// LOC100287164 /// RASA4	0.0046457				0	0.00629712
ITSN1	0.0046457				SS18L2	0.00631349
RGL1	0.00466388				EFNA1	0.00639052
0	0.00466408				WDR52	0.00643034
LOC728392 /// NLRP1	0.00473597				PIP5K1A	0.00643034
DAAM2	0.00477253				0	0.00643707
ME1	0.00481191				RAP1GAP2	0.00644296
PTGER2	0.00482116				UGDH	0.00650714
SULF1	0.00482905				MAT2A	0.0065787
THSD7A	0.00482905				SC5DL	0.0065787
CFH	0.00482905				SC5DL	0.0065787
CALD1	0.00482905				CDK19	0.0065787
EPB41L3	0.00482905				PSME4	0.00658226
GSTM5	0.00483842				AMD1	0.00659223
AIF1	0.00483842				ILF3	0.00659828
ARHGAP25	0.00483842				TMEM63A	0.00665962
CHN1	0.00483842				F11R	0.00690993
MAP1A	0.00483842				COLEC12	0.00707929
PRKCB	0.00483842				SNRPN	0.00734712
EMP3	0.00483842				EPRS	0.00737095
EPHA3	0.00483842				0	0.00745547
0	0.00483842				INHBB	0.00745547
LAMA2	0.00483842				ELF3	0.00752775
AKAP12	0.00489977				HMGCR	0.00755712
SDC3	0.00491207				RFPL2	0.00756768
0	0.00491232				BCOR	0.00759024
PLTP	0.00494358				SLC39A6	0.00759024
S100A13	0.00494502				0	0.00759479
MCAM	0.00494502				GOLGA8A /// GOLGA8B	0.00759529
CHRDL1	0.00494526				COX16	0.00762134
CELF2	0.00494526				GM2A	0.007679
0	0.00494526				CRYM	0.00770945
MICAL1	0.00494526				SATB1	0.00797954
NACC2	0.00501682				CLCN3	0.00801476
GZMA	0.00504737				TBC1D8B	0.00809405
SERPING1	0.00506688				CD164	0.00809405
LAPTM5	0.00509304				BCL2L1	0.00814283
TRPS1	0.00509911				REXO2	0.0083051
GAB2	0.00509911				RHOBTB3	0.00832021
CLIP2	0.00509911				MCTP2	0.00843439
FADS3	0.00509911				0	0.00845071
0	0.00509911				ARSD	0.00853464
ITGA4	0.00509911				RFPL3	0.00858534
C3orf64	0.00509911				ALDH3A2	0.00865705
STX2	0.00509911				NUP98	0.00877423
0	0.00509911				ELF3	0.00877423
NELL2	0.00509911				COL2A1	0.00893565
LGALS1	0.00510511				ZNF814	0.00895671
FCHSD2	0.00510511				ENOSF1	0.00900388
MEF2C	0.00510511				MTMR1	0.00914377
SULF1	0.00510511				WNT5B	0.00914377
LAIR1	0.00510511				ZMYND8	0.00921244
NID1	0.00510511				KLK1	0.00932589
OSR2	0.00510511				0	0.00940605
VSIG4	0.00510511				0	0.0094757
FLT1	0.00511085				ADRBK1	0.0094757
RASGRP2	0.00511321				CD24	0.00964101
ZAP70	0.00511321				IL6R	0.00965839
CD248	0.00511946				ELL2	0.00967596
GPM6A	0.00511946				YWHAE	0.0096948
LAMB1	0.00514407				ANK3	0.00972144
HSD11B1	0.00516346				PART1	0.0097234
NCKAP1L	0.00517189				SFRS5	0.0097554
0	0.00517189				KDELR1	0.00979088
RAB31	0.00521668				RNF39	0.00981841
TIE1	0.00529516				ACOX1	0.00983757
DOCK2	0.00529516				CLCN3	0.00983757
TACC3	0.00536207				PKP3	0.00983757
GNG11	0.00543053				PCYOX1	0.00985278
TRANK1	0.00547048				PDE11A	0.0098727
RBP1	0.005471				CLDN3	0.00988589
EFEMP1	0.00548448				CD24	0.00989226
PKD2	0.00548448				RAP1GAP	0.00996416
CLEC2B	0.00552632				PTPRF	0.00997564
LILRB2	0.0055802				---	0.0100285
PECAM1	0.00563296				UBE2E3	0.0100451
IL10RA	0.00564357				ARHGEF7	0.0100808
DNAJB4	0.00567929				OVOL2	0.0101312
KCNH2	0.00571932				ATP2C2	0.0101983
DSE	0.00571989				ZNF217	0.0102161
STK38L	0.00576019				MAP2K6	0.0102161
FHL1	0.00576815				EPN3	0.0102161
BMP5	0.00578419				PATZ1	0.0102349
0	0.00579324				MEX3D	0.0103475
MCAM	0.00580155				CYP39A1	0.0103475
PTGS1	0.00580155				PTK7	0.0103812
0	0.00583733				TESK2	0.0105472
SPON1	0.00583733				SYNJ2BP	0.0105511
---	0.00583733				ICA1	0.0105643
ZEB1	0.00583733				LOC388152 /// LOC727751 /// LOC727849 /// LOC80154	0.0105643
HDC	0.00583733				G3BP2	0.0105643
TRPV2	0.00583733				CLDN4	0.0106239
LDB3	0.00583733				G3BP2	0.0106821
SORBS1	0.00583733				CADM4	0.0106955
FN1	0.00583733				---	0.0106955
HSPB1	0.00583733				M6PR	0.0107268
ME1	0.00583966				MYO1B	0.0107268
DIAPH2	0.00583966				FLJ13197	0.0107636
ITGB1BP2	0.00583966				AGA	0.0107636
GIMAP4	0.00585447				CYB561	0.0107636
DPEP2	0.00592642				SHANK2	0.0107636
RARRES2	0.00592642				RASSF7	0.0107636
0	0.00592642				AIM1	0.0107727
ACSL4	0.00592642				NEO1	0.0108063
JAM3	0.00599126				AMACR	0.0108323
CDC42EP3	0.00599126				CDK19	0.0108703
TPSAB1	0.00599126				KIAA1324	0.0109866
PDE2A	0.00599126				SHANK2	0.011042
LAPTM4B	0.00599126				NEAT1	0.0110474
TFPI	0.00599126				SCGB2A1	0.0111193
MASP1	0.00603401				CENPN	0.0111231
ISLR	0.00606107				LOC642869 /// SET	0.0111312
MEOX1	0.00609243				PIK3CB	0.0111313
PMP22	0.00609243				OCLN	0.0111313
MAP4K1	0.00609243				DLK2	0.011147
CLU	0.00609807				PDGFA	0.0112248
CD163	0.00609807				SEMA6A	0.0113962
CSF1R	0.00609807				PRSS16	0.0114298
0	0.00609807				RAB27B	0.0114298
FYN	0.00609807				NRG1	0.0114606
FEZ1	0.00609807				SOAT1	0.0115323
OLFML1	0.00613823				TGFA	0.0116298
MICB	0.00615298				NAA35	0.0116298
HS3ST3A1	0.00615821				SPEN	0.0116298
CD93	0.00615988				WWC1	0.0117069
APBA2	0.00615988				NBR1	0.0117757
FBLN2	0.00615988				GCNT1	0.0117909
MOXD1	0.00619826				MLL	0.0117923
CORO1A	0.00629712				C19orf6	0.0118222
RFTN1	0.00631349				0	0.0118921
PTGS1	0.00631349				SCAMP1	0.0119011
GIPC2	0.00631349				FOXO3 /// FOXO3B	0.0120833
DENND2A	0.00631349				SLC5A1	0.0122325
---	0.00631349				TESC	0.0122455
FRZB	0.00642471				ADI1	0.0122455
FN1	0.00642471				TOP1	0.0122603
CD53	0.00642471				SFN	0.0122603
SLFN12	0.00643034				FASTKD2	0.0123417
MAP4K1	0.00643034				C3orf52	0.0123417
0	0.00643034				COL9A1	0.0123494
FGFR1	0.00643034				FBXL8	0.0123499
PRKCB	0.00643034				TP53	0.0123499
KANK2	0.00643034				---	0.0124577
TPST1	0.00643707				XDH	0.0125155
ITSN1	0.00644296				ATP6V1A	0.012597
ID4	0.00644296				PLS1	0.0126404
PTGIS	0.0065787				FZD1	0.0126958
VWF	0.0065787				PTBP1	0.0127716
SLC43A3	0.0065787				TBC1D30	0.0127716
MRC2	0.00659577				TGIF1	0.0127716
ENTPD1	0.00661467				LYPD3	0.0127716
GLT25D2	0.00674749				PATZ1	0.0127716
ELTD1	0.0068573				GNG4	0.0128864
FN1	0.00690613				SFRP1	0.0129804
IL18R1	0.00690993				---	0.0130315
LST1	0.00690993				MAZ	0.0130696
DMPK	0.00690993				RERE	0.0132143
FN1	0.00692986				VIPR1	0.0132827
MCAM	0.00698693				EML4	0.0132827
PDLIM7	0.00701632				GLO1	0.0132827
DES	0.00705691				GTF2I	0.0132948
LTBP4	0.00707929				GLYR1	0.0133174
CXCL12	0.00707929				SCARB2	0.0133174
TRPC1	0.00721876				ATP2C2	0.0133174
CCL19	0.00721989				---	0.0133174
EPB41L3	0.00721989				CD24	0.0133174
RASIP1	0.00729002				PRRC1	0.0133513
MMRN2	0.00729002				MAP7	0.0134511
PTRF	0.00731916				0	0.0134511
DES /// FAM48A	0.00731916				ZC3H11A	0.0134511
PTPRC	0.0074326				TRIM2	0.0134511
FAM102A	0.00747031				BAT1	0.0134792
LCP2	0.00748547				KDELR3	0.01354
KCNH2	0.00753431				GABRG3	0.0135876
0	0.00753431				BCKDHB	0.0135876
CECR1	0.00754835				EDN2	0.0135888
LY86	0.00756095				LMAN1	0.0136263
IFI27	0.00756768				NDRG1	0.0136263
PPP1R16B	0.00758241				RPL31	0.0136604
FLNC	0.00758241				HIPK1	0.0137563
LUM	0.00758752				HMGCR	0.0137563
CSDC2	0.00759024				---	0.0137563
MYO1F	0.00759024				UBXN4	0.0137609
HSPA2	0.00759479				CD24	0.0137888
TPSAB1 /// TPSB2	0.0075974				IRX5	0.0138563
BMP5	0.00765253				THRAP3	0.0138835
HCLS1	0.00768718				SRPR	0.0139589
TPSB2	0.00771983				MLPH	0.0140215
S1PR1	0.00771983				ICA1	0.0140215
GLT8D2	0.00773939				NEBL	0.0140257
C11orf95	0.00782238				PGM3	0.0140767
TACC1	0.00782238				ODC1	0.0140904
DPYSL3	0.00782238				CWH43	0.0140937
EFEMP1	0.00786137				LGALS8	0.0141512
ROR1	0.00798223				AP1S1	0.0141548
MGP	0.0080043				BSPRY	0.0141811
SELPLG	0.00808167				SGMS1	0.0141819
FAM105A	0.00810493				CDK19	0.014289
PIK3R3	0.00810493				GHR	0.0144548
TGFBR3	0.00810493				ZFX /// ZFY	0.0145647
MAMLD1	0.00814283				CDCP1	0.0145752
CLIC2	0.00820533				ERLIN1	0.0146793
SV2A	0.00823494				NEFL	0.0148465
SACS	0.0082485				CDC14A	0.0148762
FCGR2A	0.00825788				C14orf1	0.0148762
WNT2B	0.0083051				CEACAM1	0.0149599
ENPEP	0.0083051				EPB41L4B	0.0151222
MCAM	0.0083051				HSPC159	0.0151222
IGFBP4	0.0083164				PKN2	0.0152281
DPT	0.00833865				SMARCC1	0.0152281
PID1	0.00833865				CREB3L1	0.0152281
MAOB	0.00835854				TRIM29	0.0152281
FXYD5	0.00835854				0	0.0152651
CCDC46	0.00835854				HIST1H4E	0.015456
ENG	0.00842273				BAT2L2	0.0155002
DAB2	0.00844245				NEU1	0.0155569
CCL14 /// CCL14-CCL15 /// CCL15	0.00844245				ST6GAL1	0.0156277
TGFBI	0.00844245				PDE4B	0.0157444
ITM2A	0.00845278				PERP	0.015751
ADAM19	0.0084911				GTF2H2 /// GTF2H2B /// GTF2H2C /// GTF2H2D	0.015751
PKIG	0.00850953				PTER	0.0160399
ITGA9	0.00853464				0	0.0160399
0	0.00854266				OAZ3	0.0161325
HSPG2	0.00855015				CLDN3	0.0161788
EPB41L2	0.00858534				---	0.0162072
GBP2	0.00859575				EPS8L1	0.0162072
ECM1	0.00859575				EDN1	0.016209
C1QB	0.00861197				LGALS8	0.0165479
TOX	0.00861228				CD24	0.016616
COL5A3	0.00861748				TOX3	0.0166175
PCOLCE2	0.008635				TP53I11	0.0167119
RBPMS	0.00866035				FAT1	0.0167485
SULF1	0.00877423				AMPD3	0.0167824
FERMT2	0.00877897				IGF2R	0.0167929
FYN	0.00880882				HOXB13	0.0168626
MAP3K12	0.00882077				0	0.0169378
EFEMP2	0.00882077				ENC1	0.016987
EFEMP2	0.00885448				PTK6	0.0170866
EPM2A	0.0088963				TMEM2	0.0170908
TPM2	0.00893565				LLGL2	0.0170908
---	0.00894672				EZR	0.0173263
CERK	0.00900388				FKBP1A	0.0173348
CD163	0.0090309				HES1	0.0173348
NKG7	0.00914169				SLC35E1	0.0173803
ARHGAP15	0.00914377				TOX3	0.0173816
SH2B3	0.00914377				OVOL2	0.0173903
RAB31	0.00914377				MTERFD2	0.0176009
NID2	0.00921244				SAR1A	0.0176221
UST	0.00921244				BCAM	0.0176221
THY1	0.00921244				CYP1B1	0.017811
LST1	0.0092301				HES1	0.0178721
COL6A2	0.00961572				NDRG3	0.0179396
ICAM2	0.00961572				0	0.0179436
DOCK3	0.00967596				TLE1	0.0179436
LMOD1	0.00967596				ACHE	0.0180036
FXYD6	0.0096948				EYA2	0.0181708
ITGA7	0.00972144				GALNT4 /// POC1B	0.0181708
SLA	0.00972654				ENPP4	0.0181871
SGCB	0.00972654				MARK2	0.0181871
ZYX	0.00974589				COBLL1	0.0183007
DST	0.00977474				CACNA1D	0.0183054
CRYAB	0.00983757				C7orf28B	0.0183054
RAB11FIP2	0.00983757				LIG3	0.0183054
APOLD1	0.00983757				B4GALT4	0.0184135
LPAR1	0.00983757				0	0.0184713
FXYD1	0.00983757				FBP1	0.0184753
MAPK12	0.00983757				EDAR	0.0184753
PTPRC	0.00988589				HSD11B2	0.0187445
CMAH	0.00988589				FLNB	0.0187458
ST3GAL1	0.00988589				AAK1	0.0188635
DYNC1I1	0.00989226				ZNF702P	0.0188875
TPSAB1	0.00989226				CDR2L	0.0189299
DKK3	0.00990963				0	0.0190058
RBPMS	0.00996416				SATB2	0.0190058
RBM38	0.0100285				RPL37A	0.0190079
ADCY9	0.0100337				PRKCD	0.0190079
CHST3	0.0100474				0	0.0190238
CXCL13	0.0101185				0	0.0191318
PECAM1	0.0101312				SEMA6A	0.0191479
ARHGEF4	0.0101685				GALNT7	0.0191794
FADS3	0.0101983				CD24	0.0192007
IL33	0.0102161				ZNF180	0.0192007
MX1	0.0102161				---	0.0192007
VCAN	0.0102161				PCDHGA10	0.0194316
0	0.0102161				CGA	0.0194316
---	0.0102161				RNFT1	0.0194854
LAMA4	0.0102161				GMPPB	0.0195956
INHBA	0.0102176				SGSM3	0.0196358
GPR20	0.0102592				TLR5	0.0196358
0	0.0103467				COPA	0.0196789
STARD8	0.0103475				GTF2H2B	0.0196912
PNMAL1	0.0103475				SHMT2	0.0197158
COL6A2	0.0103479				NBPF10	0.0198665
GAS6	0.0104195				TRA2A	0.0199154
AIF1	0.0104577				ZSCAN18	0.0199154
ARAP3	0.0104784				SLC35A3	0.0199462
ARHGAP25	0.0105026				ATP2C1	0.0200639
0	0.010532				ZNF432	0.0200781
ATF7IP2	0.0105511				TRAK1	0.0200901
PPP1R1A	0.0105511				ATP6V0A1	0.0200901
MVP	0.0107268				SYNCRIP	0.0200901
GSTM3	0.0107268				TFAP2A	0.0200901
ENO2	0.0107433				ZFP36L1	0.0201816
ITSN1	0.0107483				EZR	0.0202288
S100A6	0.0107483				ERF	0.0203155
ACAP1	0.0107483				BCL3	0.0203155
DKK3	0.0107636				SNAP23	0.0203155
WNT2B	0.0107636				PIGA	0.0203485
MTMR11	0.0107636				SCGN	0.0203729
FLNA	0.0107636				MCF2L	0.0203765
LPIN1	0.0107636				KIAA1661	0.0204043
BMP4	0.0107636				TNFSF10	0.020434
CCND2	0.0107636				HOMER2	0.020434
TNS1	0.0107934				LAD1	0.0204353
CAV1	0.0108063				TDP2	0.0204353
C1orf54	0.0108323				SLC17A5	0.0204627
DIAPH2	0.0108323				SEZ6L2	0.0204925
LAMB1	0.0108323				---	0.0206422
PDGFRA	0.0108703				STAT2	0.0206557
NINJ2	0.0108891				---	0.0206629
SPEG	0.0109431				SCD	0.0207557
STK38L	0.0109891				MCF2L	0.0208615
CD37	0.0109913				ATP2C1	0.020933
TMEM158	0.0109959				GDF9	0.0210074
LPHN2	0.011025				ADRB2	0.0210321
CD3D	0.011042				CTBS	0.0211503
MFAP2	0.011042				TRA2A	0.0212221
CTSK	0.0110474				KDM4B	0.0212292
SLC24A3	0.0111193				ALDH3A2	0.0212834
RBP4	0.0111379				ARFIP1	0.0214094
CD2	0.0111379				MED28	0.02151
FHOD3	0.011147				ZNF185	0.021583
GAS6	0.0111822				TOX3	0.021583
GATM	0.0112746				ERBB3	0.0216932
VWA5A	0.0112976				PTPRA	0.0216932
AKR1B1	0.0113008				FASTKD2	0.0216932
0	0.0114298				USP9Y	0.0217125
PDLIM3	0.0114298				ZNF75D	0.0217899
CD14	0.0114986				NPAS2	0.0218259
HCK	0.0115107				SEC23B	0.021829
F10	0.011529				ARF1	0.021829
CMAH	0.0116298				OGT	0.0218848
ITM2A	0.0116298				---	0.0219805
ECM2	0.0116298				SMARCC1	0.0219805
TUBB6	0.0116298				EFNB3	0.0220009
TRPC1	0.0116298				ZNF331	0.0220009
COL8A2	0.0116298				FOXO3 /// FOXO3B	0.0221218
FGF2	0.0116298				THOC2	0.0221777
HLA-DRB1	0.0116298				NFAT5	0.0223182
CRIM1	0.0117069				SNAP23	0.0224198
ABLIM3	0.0117757				PARG	0.0224207
P2RY13	0.0117757				PXN	0.0224397
QKI	0.0117928				SCAMP1	0.0225436
SRPX2	0.0117974				SH3BP4	0.0226479
CSF2RB	0.0118004				SCARB2	0.0228453
SFXN3	0.0118222				FOXA1	0.0228458
PLEK	0.0119108				SLC22A4	0.02291
RAB40A	0.0119223				TAF9B	0.0229269
LCK	0.0119825				CTBS	0.0229841
CALD1	0.012008				CANX	0.0230202
EPB41L3	0.0120833				ATP8A2	0.0230262
COX7A1	0.0122395				UBE2J1	0.0231597
SCARA3	0.012332				SORBS3	0.0232718
ALOX5AP	0.0123417				MPDU1	0.0233656
CAV2	0.0123417				RALGDS	0.0236181
CAV2	0.0123417				PTPRF	0.0237825
SLC9A6	0.0123499				KIF22	0.0238507
IFITM2	0.0123499				0	0.0238507
OCA2	0.0123832				0	0.0238507
MXRA7	0.012426				SCYL2	0.0239553
TPSAB1	0.0124577				NPAS2	0.0239758
PRF1	0.0124577				SLC30A4	0.024021
TUBA1A	0.0124608				C19orf6	0.0241038
RRAD	0.0125267				CWH43	0.0241038
FGFR4	0.0125267				IKBKB	0.0241038
TBL1X	0.012553				ATP8A1	0.0241038
DOCK10	0.0125768				LCP1	0.0241351
GATA6	0.0125923				CACNA1D	0.0241595
PGCP	0.012597				DICER1	0.0242763
CD79B	0.012597				SEL1L3	0.0244344
DNAJB5	0.0126404				PRPF4	0.0245643
PTGS1	0.012644				WSB1	0.0245788
ABCG2	0.0126716				FNBP1L	0.0246767
LPAR1	0.0126716				NET1	0.0247095
MLC1	0.0126997				ATP2C1	0.0248533
PRKCA	0.0127202				EPS8L1	0.0248533
POPDC2	0.0127716				FAM36A /// HOXA7	0.0248533
KDR	0.0127716				HOXA6	0.0248572
NAALAD2	0.0127984				MET	0.0248667
SERPINA5	0.0128492				CYP1B1	0.0250536
PALLD	0.0128835				0	0.025106
SOD3	0.0129066				C11orf75	0.0251696
TM6SF1	0.0129073				SLC45A2	0.0252506
RASGRP2	0.0129804				PRSS8	0.0253406
AOC3	0.0129836				SMC3	0.0253646
SLIT2	0.0130068				SLIT1	0.0254139
PARVA	0.0131315				GATA2	0.0254139
RAC2	0.0133174				EZR	0.0255084
ATP2B4	0.0133174				ICA1	0.0255456
PPP1R12B	0.0133174				TARBP1	0.025852
PIK3CD	0.0133174				NEBL	0.0258559
KCNMB1	0.013322				SSR1	0.0258884
AHNAK2	0.0134011				PASK	0.0259026
HEG1	0.0134011				ZFP36L2	0.0259527
TPPP3	0.0134014				STX3	0.0260136
CD48	0.0134014				PIGR	0.0260581
LRRC17	0.0134014				0	0.0260594
GLI2	0.0134014				AKAP9	0.0262035
NCF4	0.0134014				TMX1	0.0263039
0	0.0134014				INADL	0.0263288
LIMS2	0.0134511				DNAJB1	0.0263687
FAM55C	0.0134511				AQP3	0.0263864
LCP2	0.0134774				EIF4G1	0.0263864
FZD7	0.01354				SH3GLB2	0.0263979
EML1	0.0135888				SCG2	0.0263979
FAM105A	0.0135888				ALDH7A1	0.0264317
CAV1	0.0135888				ENOSF1	0.0264359
MAP4K1	0.0135888				DDX3X	0.0264401
TRAF3IP3	0.0136263				CSNK1A1	0.0264426
SFXN3	0.0136263				RAB15	0.0264725
COL8A2	0.0136263				DUSP14	0.0265407
IL32	0.0136315				TDRD12	0.0266407
EPS8	0.0136576				VEGFA	0.0266457
FOXF1	0.0136576				GALNT3	0.0266457
HERC5	0.0136576				STK39	0.0266457
VIM	0.0136576				TMEM8A	0.0267187
DSCC1	0.0136604				NAPA	0.0267907
ADAMTS1	0.0136993				DDC	0.0267963
LST1	0.0137563				EFTUD1	0.0268217
NRP1	0.0137563				DCAF7	0.0269541
SNX7	0.0137572				ST14	0.0269573
TNS1	0.0137609				---	0.0270252
ADH1C	0.0137836				DDX11	0.027152
TRHDE	0.0137888				ARHGDIA	0.0275548
SMARCD3	0.013887				GPC3	0.0275808
AKAP2 /// PALM2-AKAP2	0.013887				F5	0.0276247
CD97	0.0139716				FDFT1	0.0276591
PLCE1	0.0140199				MPZL2	0.0276727
VCAN	0.0140199				ZNF350	0.0276727
NLRP1	0.0140215				EPB41L4B	0.0276727
VCL	0.0140215				CORO2A	0.0276727
DTNA	0.0140215				SMC3	0.0279423
TPSAB1 /// TPSB2	0.0140257				GATAD1	0.0279423
CHST3	0.0140257				ADAM10	0.0279806
TGFB1I1	0.0140375				CDC14A	0.027992
COTL1	0.0140904				CDS1	0.0281417
C3AR1	0.0140937				GFPT1	0.0281437
SEMA3B	0.0140937				AP1S1	0.0283104
FBN1	0.0141362				BAG5	0.0283104
C1orf38	0.0141811				GPATCH2	0.0283104
LMO2	0.0141811				---	0.0283104
FLI1	0.0141811				C1orf116	0.0283104
ITIH5	0.014207				KDM4B	0.0283104
ODZ1	0.0145598				RCAN3	0.0283993
AIF1	0.0145598				SLC16A5	0.0284553
ADA	0.0146938				TRAF4	0.0284584
0	0.0147839				VANGL1	0.0284917
CCR1	0.0148408				MAPK13	0.0285923
PALLD	0.0148465				SFRS7	0.0286999
MMP2	0.0148465				ATP7B	0.0286999
DTNA	0.0148465				TMED2	0.0286999
NPR2	0.0149209				---	0.0287097
FBLN1	0.0149209				ATP2C1	0.0289468
CPVL	0.0149599				REL	0.0289631
TMOD1	0.015019				EPHX2	0.0290661
ENTPD1	0.015019				TMEM97	0.0290661
FLNA	0.0150328				SERHL2	0.0290661
B4GALT6	0.0150694				SULT2B1	0.0290818
LDB3	0.0151101				STON1	0.0292331
RGS13	0.0155002				0	0.0292663
SLAMF8	0.0155107				KDM6B	0.0293022
UBE2I	0.0155107				FLRT3	0.0293561
SLC24A3	0.0155107				ATF5	0.0294221
BEND5	0.015517				ATRX	0.0294498
PDE4DIP	0.0155321				SKAP2	0.029532
TRO	0.0155555				0	0.0295803
RNASE6	0.0155703				GJB1	0.0296145
NLRP1	0.0156277				HOXA9	0.0297147
ITGA7	0.0157444				ENDOD1	0.0297356
RND3	0.015751				ANAPC5	0.0298348
LMOD1	0.0157788				SFRP1	0.0298348
RSAD2	0.0158809				MLL	0.0298506
CD52	0.0159313				UBE2H	0.0298554
ACTN1	0.0160391				PRRG4	0.0299256
0	0.0160399				ESRP1	0.0299521
LAMA4	0.016209				MFHAS1	0.0299864
DAB2	0.0162971				DDX17	0.030143
SYNJ1	0.0164354				PRPF4B	0.0303322
STOM	0.0164808				0	0.0303829
PEX14	0.0165261				RAPGEF2	0.0304335
OLFM1	0.0166175				ATP13A3	0.0305281
TGFBR2	0.0166358				0	0.0306126
IFITM3	0.0166358				ERAP1	0.0306507
LST1	0.0167119				ING1	0.0307819
COL4A2	0.016749				ARHGAP8 /// PRR5 /// PRR5-ARHGAP8	0.0308553
CNN1	0.0168693				ATXN7L3B	0.0309013
0	0.0168693				ATP7A	0.0309382
SSX2IP	0.0169641				CEBPA	0.0309424
GPM6B	0.0170394				ABCG1	0.0310358
SSX2IP	0.0171021				IL17RC	0.0310358
HLX	0.0171021				0	0.0310732
TRAC	0.0171021				TFDP2	0.0314494
FCGR3B	0.0172229				PRPF6	0.0314622
STAC	0.0173263				DST	0.0314857
CCL5	0.0173816				SLC7A8	0.0315168
VWA1	0.0175446				PLEC	0.0315457
SPINK2	0.0176009				TRIM2	0.0315602
RRAD	0.0176009				PLEKHB2	0.0315952
PLS3	0.017623				UTRN	0.0316559
CD200	0.0178375				RNF43	0.0316961
MPHOSPH9	0.0179021				TNFRSF21	0.0317558
P2RX5	0.0179396				---	0.0317859
0	0.0179436				TMED2	0.0318093
ITGA8	0.0179436				DUSP4	0.0318093
KCNJ8	0.0179436				ETNK1	0.0318249
SAMD4A	0.0179605				SNAP91	0.0318735
TMEM140	0.0179605				ING1	0.0319503
TRAF3IP3	0.0180036				C9orf91	0.0322041
NDC80	0.0180036				SFRS11	0.0322212
ZNF804A	0.0180036				C10orf57	0.0322394
GRK5	0.0181708				PAK6	0.0323092
MAPK10	0.0181871				JUND	0.0323092
TNXA /// TNXB	0.0181871				PART1	0.0323422
PECAM1	0.0181871				LRBA	0.0323581
HHEX	0.0181871				ARHGAP32	0.0323864
LTBP4	0.0182008				SCD	0.0325243
SLC46A3	0.0182949				0	0.0325739
RNASE1	0.0182949				HNRNPH1	0.0326313
ALDH1B1	0.0183007				FAM118A	0.0326669
0	0.0183007				ADAM10	0.0327012
ATP2B4	0.0183007				PCBP2	0.0327177
RASGRP1	0.0183007				CENPN	0.0333724
GZMH	0.0183054				KLK11	0.0333915
HTRA1	0.0183054				ELK4	0.0336271
NCF1 /// NCF1B /// NCF1C	0.0183054				NFAT5	0.0337378
MNS1	0.0183959				TMEM97	0.0338094
HSPB3	0.0184097				PDLIM5	0.0338094
TYROBP	0.0184939				TOB2	0.0338483
SPG20	0.0184939				SLC25A37	0.0339476
TPM1	0.0186828				KLF5	0.0339701
PRRX2	0.0187445				TAOK3	0.034008
PTPN7	0.018965				GOLGA2	0.0340532
LTBP2	0.0190079				RXRB	0.034156
FBXL2	0.0190238				CYP51A1	0.0341618
PLAGL1	0.0190238				STYK1	0.0345015
CALD1	0.0190495				ID2 /// ID2B	0.0345434
RYR2	0.0190653				KCNK1	0.0345434
PELO	0.0190653				SMA4	0.0346385
NT5E	0.0191082				UCK2	0.0346385
0	0.019161				OGT	0.0346385
FKBP10	0.0192261				SLC2A5	0.0346385
TMEM176B	0.019261				0	0.0347655
MYL9	0.0192766				ENTPD6	0.0348039
0	0.0193426				NQO1	0.0348039
DZIP1	0.0193426				NEDD9	0.0348039
DRAM1	0.0194316				C5orf30	0.0348059
CBX7	0.0194316				SEL1L	0.0349997
RAI14	0.0194316				NEBL	0.0349997
RRAS	0.0195538				NUDT9	0.0349997
TPSAB1	0.0195629				MAP3K5	0.0349997
SCRG1	0.0195715				UTRN	0.0350709
CRIP1	0.0195754				ASTN2	0.0351697
WNT4	0.0196912				SLC4A4	0.0351991
RAMP3	0.0198049				SEL1L3	0.0352228
BTN3A3	0.0198319				ARHGAP8 /// PRR5 /// PRR5-ARHGAP8	0.0352228
HSPB2	0.019833				GTF2F1	0.0352453
FGF2	0.0199154				GLUL	0.0352575
EVI2B	0.0199154				TUFT1	0.0352784
IGFBP7	0.0199154				KLF6	0.0352784
PSIP1	0.0199462				FGF1	0.0355085
FCGR2B	0.0199953				GFPT1	0.0356077
HLA-DPB1	0.0200781				HN1L	0.0356227
0	0.0200781				MPP5	0.0356859
ATRNL1	0.0200901				IRS1	0.0356987
NLRP1	0.0200901				KLHL24	0.0357461
PLCE1	0.0200901				ANKHD1-EIF4EBP3 /// EIF4EBP3	0.0357633
FLNA	0.0201027				EPS8L1	0.0358528
CALD1	0.0201027				SERHL2	0.0358813
FZD7	0.0201027				UAP1	0.035884
LAMC1	0.020149				LUZP2	0.0359091
TEK	0.0201498				SCNN1A	0.0359678
CST7	0.0202805				FAM108B1	0.036063
CD200	0.0202805				KBTBD11	0.036073
LTBP1	0.0203155				USP10	0.0362881
ATP1A2	0.0203155				BACE2	0.0363855
SEC23A	0.0203765				SLC7A8	0.0364029
FBXO2	0.0203765				MYCL1	0.0367418
PDPN	0.0203765				KLHL24	0.0367418
UPP1	0.0204353				BZW1 /// BZW1L1	0.0367453
PNMT	0.0204627				---	0.0372083
CDH5	0.0204663				0	0.0372501
MATN2	0.0204663				SMA4 /// SMA5	0.0373236
0	0.0204733				CYB5A	0.0373236
TNC	0.0204733				TBC1D30	0.0373236
HOXD13	0.020566				GUCY1A3	0.0374075
ATRNL1	0.0206471				ELMO3	0.0376359
DPT	0.0208393				KRT18	0.0376472
SSX2IP	0.0209006				PSAT1	0.0376472
CD247	0.0209275				SERPINI1	0.0376832
HLA-DRB1 /// HLA-DRB4	0.0209312				TRPM8	0.0378491
STAP1	0.0210006				GCNT3	0.0380377
VCAN	0.021097				0	0.0380377
PRKCQ	0.0211283				NXT2	0.0380377
DCN	0.0211564				CHD7	0.0382293
---	0.0211713				MARCKSL1	0.0382586
DZIP1	0.0212292				ACLY	0.0384544
GPM6B	0.0214094				NSUN6	0.0385034
ANGPTL2	0.0214738				LOC100291393 /// SHC2	0.0388199
G0S2	0.02151				AP1M2	0.0388209
UCHL1	0.0215841				C14orf135	0.0388982
EDNRB	0.0215841				VPS37B	0.0388982
TGM2	0.0216932				MARCKS	0.0389385
TNXA /// TNXB	0.0217899				ZDHHC13	0.0391159
ELMO1	0.021829				PPFIBP1	0.0391513
EEF1D	0.021829				RTN1	0.0392039
MS4A1	0.0219575				0	0.0393768
TPM1	0.0219805				RBL2	0.039523
RGS3	0.0220163				ALDH6A1	0.0396434
TCF4	0.022088				SCNN1B	0.0397156
FSCN1	0.0221391				BTG2	0.0397156
FHL1	0.02232				HOOK1	0.0397156
ST8SIA1	0.0223212				PAICS	0.0397156
CDH10	0.0224207				SLC35A3	0.0397156
PLCG2	0.0224614				ZNF443	0.0397156
PLAG1	0.0224644				DHRS7	0.0398226
SOCS1	0.0225063				RBBP4	0.0399176
TNIK	0.0225385				PACRG	0.0399656
0	0.0226479				ESRRG	0.0399656
ITK	0.0226479				LOC100134018 /// LOC100289410	0.0399872
GNAZ	0.0227506				PEX10	0.0400734
MRC1 /// MRC1L1	0.0229351				INSIG1	0.0400734
QPRT	0.022963				LOC100292959	0.040083
SDC2	0.0231597				GRAMD1C	0.0401789
TRIP6	0.023228				WWC1	0.0401789
BTN3A3	0.0233162				RBM8A	0.0401789
MBNL2	0.0233656				NAB1	0.0403373
ZEB1	0.0237084				NCOA2	0.0403431
TMEM176A	0.0237184				BIK	0.0404334
EVI2A	0.0237476				ALCAM	0.0406469
0	0.0238507				SC4MOL	0.0408975
ZNF423	0.0238507				SECISBP2L	0.0409658
PSIP1	0.0238507				MAK	0.0410816
CRIM1	0.0238507				CNTNAP2	0.0411829
ANXA2P2	0.0239082				---	0.0411829
EMILIN1	0.0239391				KIF5C	0.0411829
TRBC1	0.0239391				RAB17	0.0411829
CD74	0.0239553				JUND	0.0412287
RBPMS	0.0240363				---	0.0413725
COL4A6	0.0240692				SYNGR2	0.0413725
TLR2	0.0241038				EPCAM	0.0415673
PLA2G5	0.0241038				NCRNA00094	0.0415701
KCNJ8	0.0241351				LONP2	0.0416057
FHL1	0.0241422				UPK3A	0.0416444
CCDC109B	0.0241422				STX16	0.042138
CES1	0.024155				PDE9A	0.042138
MAL	0.0245013				ITPR2	0.0421739
SAMSN1	0.0245131				UBA6	0.0421739
MNDA	0.0245622				EDEM3	0.0422313
CPA3	0.0247084				DNA2	0.0423466
CD300A	0.0247237				MAPK13	0.0423466
RAP2C	0.0247283				MYO1E	0.0424852
NUCKS1	0.0248533				LRBA	0.0424852
ARHGEF9	0.0248572				CYB5A	0.0427596
RPL39L	0.0251127				CANT1	0.0428141
TTC28	0.0251558				---	0.0429955
PPP1R12A	0.0252046				---	0.0429955
CD52	0.0255456				PTPRN2	0.0429961
LOC100132214 /// RASA4 /// RASA4P	0.0255456				TFF1	0.0433077
CSPG4	0.0255492				KIF22	0.0433077
ANP32E	0.0256079				ITGB6	0.0433241
PFKP	0.0256571				WSB1	0.0435937
SELL	0.0256571				TMSB15A	0.0439551
KLRK1	0.0258354				TM7SF2	0.0441352
GPM6B	0.0258354				0	0.0441785
CALD1	0.0259113				---	0.0443538
0	0.0259362				CYP1B1	0.0444901
RGS5	0.0260136				PTPRN2	0.0444901
TGFB3	0.0260279				IDUA	0.0445077
PRELP	0.0260279				0	0.0445349
ALPK3	0.0260581				UBN1	0.0445391
CFD	0.0260594				DPP4	0.0449025
C1QL1	0.0260954				PDIA5	0.0449025
HMOX1	0.0260954				EPS8L1	0.0449025
BGN	0.0261109				CKMT1A /// CKMT1B	0.0451084
GBP1	0.0262792				0	0.0451716
DDR2	0.0263288				C4orf19	0.0452353
TRIL	0.0263288				TFPI2	0.0453054
---	0.0263864				TMBIM6	0.0454463
STAT4	0.0263864				SIDT1	0.0455584
PGF	0.0263979				MCFD2	0.0455584
FAIM3	0.0263979				ELK4	0.0456459
DBNDD2 /// SYS1 /// SYS1-DBNDD2	0.0264317				SRRM1	0.045947
MFAP4	0.0264401				BMPR1B	0.0460446
LYVE1	0.0264401				WHSC1	0.046142
ST5	0.0264733				ACACA	0.0462556
DARC	0.0265048				RTN1	0.0463713
SLCO2B1	0.0265577				LPCAT3	0.0463997
LHFPL2	0.0266457				LSM12	0.0464737
MYLK	0.0266457				SEC23B	0.0465267
FAM65B	0.0267047				ST14	0.0468671
CAMK2G	0.0267905				GLRX	0.0470573
CLEC7A	0.0267926				RSL1D1	0.0470573
PDZD2	0.0268217				LOC81691	0.0471148
SMTN	0.0269361				CALR	0.0471535
KCTD12	0.0269538				EIF4A1	0.0471818
SPON1	0.0269541				HSP90B1	0.0472695
FGF7	0.0269541				---	0.047279
MEIS1	0.0269541				0	0.0472809
SMAD6	0.0269541				LDLR	0.047357
RHOH	0.0269541				PASK	0.0474253
BMP6	0.0269607				CLPTM1	0.0474414
---	0.027093				CANT1	0.0474664
TNXA /// TNXB	0.0271041				ARHGAP32	0.0474992
OLFML2B	0.027125				TMEM97	0.0475253
IFI44L	0.027125				HGD	0.0476791
DIXDC1	0.0272366				FBXO38	0.0476978
CCL5	0.0275469				AGFG2	0.0478217
PLAGL1	0.0275548				CHRNA2	0.0478217
SEMA3E	0.0276727				LDLR	0.0478745
C1orf38	0.0276727				SFN	0.0479348
SERPINF1	0.0276727				SFN	0.048037
ARHGAP4	0.0276727				TSPAN1	0.0480479
OXTR	0.0276727				BICD1	0.0481456
0	0.0279423				PRSS22	0.0481456
GSTM1	0.0280812				HOXA5	0.0482705
ANXA2	0.0281247				TM7SF3	0.0483837
RPP25	0.0281417				FOXD1	0.0484381
DNAJC15	0.0283104				TWF1	0.0484381
SSX2IP	0.028353				NUDT4	0.0486206
CLEC4A	0.0284791				KDELR3	0.0487378
C16orf45	0.0284823				UPK1A	0.0487556
TRIL	0.0284917				FOLH1	0.0488437
LCK	0.0284917				SLC27A2	0.0488916
CSPG4	0.0284959				NFIX	0.0489306
SGCA	0.0285336				ESRRG	0.0489306
TGFB1	0.02874				NPDC1	0.0490189
AMOTL2	0.02874				BNIP3	0.0490189
IGFBP7	0.0288086				ACLY	0.0490418
TPM2	0.0288262				RUFY2	0.0490418
SVIL	0.028843				MARK1	0.049147
CASP1	0.0289631				GNB2	0.0493626
SEMA3G	0.0290599				CCDC68	0.0496328
GPR124	0.0290599				RAB3B	0.0497494
TNXB	0.0290661
GSN	0.0290818
TRBC1	0.0290868
F13A1	0.0291709
AIM2	0.0292158
ACAA2	0.0292673
SLA	0.0293258
MFGE8	0.0293561
DNAJB4	0.0293612
FHL1	0.0295031
GSTM1	0.0297059
CDKN1C	0.0297356
HLA-DRB1 /// HLA-DRB3 /// HLA-DRB4	0.0298348
IGHM	0.0298348
TRBC1	0.0299191
BCL11B	0.0299256
THBD	0.0299521
BGN	0.0299864
PPAP2B	0.0300495
ADH1B	0.0300677
IGF2 /// INS-IGF2	0.0301558
CDKN2C	0.0303372
TMEM45A	0.0304335
0	0.0304335
DTNA	0.0305052
HSPA6	0.030509
GAS7	0.030509
GPR65	0.0305092
MYH11	0.0305092
PLA2G5	0.0305378
FERMT2	0.0306449
SLCO2A1	0.0306632
MICALL1	0.0306684
SVIL	0.0307408
PLN	0.0310709
TTC28	0.0310732
PTPRG	0.0315168
ANK2	0.0316239
KYNU	0.0316444
IER5	0.0316961
PTGDS	0.0317279
OLFML3	0.0317655
ANXA2	0.0317988
CPZ	0.0318243
BAG2	0.0321447
PTGDS	0.0321532
HYMAI	0.0323092
WISP2	0.0323092
BHMT2	0.0323092
GSTM2	0.0323092
CDC42EP3	0.0325739
FAIM2	0.0326313
PTPRE	0.0326313
GGH	0.0326313
LDB3	0.0327971
CSRP1	0.0333245
C11orf73	0.033343
KLRB1	0.033343
MITF	0.0334047
PNMA2	0.0334047
SDC2	0.0335367
NFYB	0.0335947
RHEB	0.0335947
COL18A1	0.0336299
LTB	0.0337026
C1QA	0.0337354
ETV5	0.0337354
PTPN13	0.0337378
LTBP3	0.0337752
TRO	0.0338094
C3orf14	0.0339177
PENK	0.0339186
C9orf3	0.0339225
APOBEC3G	0.0339701
WIPF1	0.0340107
MAFB	0.034143
GNAO1	0.0344843
HLA-DRB1 /// HLA-DRB4 /// HLA-DRB5	0.0345215
SDPR	0.0345434
CALM1	0.0346385
TRIM16	0.0346385
PELO	0.0346385
HCRP1	0.0347655
LOC390940	0.0348351
0	0.0349322
ZNF365	0.0350425
FAM38B	0.0352575
CD8A	0.0352784
SLC16A4	0.0352994
---	0.0354504
CD69	0.0354504
CCR2	0.0355286
SH2D1A	0.0356077
COL13A1	0.0357461
RGN	0.0358414
PRSS23	0.0358528
CPEB1	0.0358528
VCAN	0.0359436
ANXA2	0.0361682
IL2RG	0.0362495
TXNRD1	0.0362831
ANGPT1	0.0365972
PLN	0.0367737
PTGDS	0.0367848
PAPSS2	0.0369556
IGF1	0.0369853
RASL11B	0.0372181
CASP1	0.0374075
DACT1	0.0375117
EPAS1	0.0375216
PLBD1	0.0376472
BST2	0.0376472
MYOM2	0.0376832
MAF	0.0376878
ACTG2	0.0377145
RAI2	0.0377661
RBMS1	0.0378794
IL4R	0.0380939
BDH2	0.0381278
TIMP3	0.0381437
RAC2	0.0382332
LGALS2	0.0382441
CAP2	0.0383596
TAGLN2	0.0384505
SLC16A3	0.0384868
TRPC1	0.0385961
MYO7A	0.0390068
FBLN1	0.0390521
MDK	0.0391513
NTRK3	0.0391524
TMEM100	0.0391524
LYN	0.0392039
DPYSL4	0.0392473
FCGR1A /// FCGR1C	0.0392815
RCAN1	0.0393448
DPY19L1	0.0396191
APOE	0.0396191
COPZ2	0.0396191
RUNX3	0.0396191
KIAA0040	0.0396224
EDNRA	0.0396224
LY96	0.0396224
BDNF	0.0397156
ASPA	0.0397156
INPP5D	0.0397156
PTPRC	0.039948
KCNAB1	0.0399656
CLEC1A	0.040164
MYO5A	0.0401789
FLRT2	0.0402644
NID1	0.0403431
SLC47A1	0.0405405
EFCAB1	0.0409658
LOXL2	0.0410211
0	0.0411829
ALDH1B1	0.0411829
GFPT2	0.0411829
EFHC2	0.0411932
BACH2	0.041228
NAV2	0.0413437
CEP68	0.0413725
DLC1	0.0414065
HOPX	0.0415139
HLA-DPA1	0.0416444
ID4	0.0418345
RAB23	0.0420439
SNAI2	0.0421945
---	0.0421945
MYO7A	0.0422482
CCR1	0.042333
EPHA7	0.0423502
NEK1	0.0423591
GPR171	0.0424852
RUNX3	0.0425645
CD79A	0.0426314
FCGR1B	0.0426363
SRF	0.0426451
PDZRN4	0.0428011
SERPINB1	0.0428338
ADH1B	0.0429955
SRPX	0.0429955
P4HA2	0.0433241
SMTN	0.0433503
NCF2	0.04349
EHD3	0.0435721
MEF2C	0.0435752
STOM	0.0438379
MST4	0.0438667
OGN	0.0439551
RPRM	0.0439551
LRMP	0.0440874
NOD2	0.0441352
HMGN5	0.0441384
HLA-DQA1 /// HLA-DQA2 /// LOC100294224 /// LOC100294317	0.0442706
FYB	0.0443538
NLRP3	0.0444276
MX2	0.0444423
SERPINB9	0.0444901
FAM65B	0.0444947
INPP5F	0.0445349
MAP1B	0.0445349
LRMP	0.0446373
ACACB	0.0447434
CORO1C	0.0447471
C13orf18	0.0447471
EGR1	0.0448872
HLA-DMA	0.0449334
PCDHA1 /// PCDHA10 /// PCDHA11 /// PCDHA12 /// PCDHA13 /// PCDHA2 /// PCDHA3 /// PCDHA4 /// PCDHA5 /// PCDHA6 /// PCDHA7 /// PCDHA8 /// PCDHA9 /// PCDHAC1 /// PCDHAC2	0.0451346
BTN3A1	0.0451539
VWA5A	0.0451716
0	0.0451716
PDLIM1	0.0453387
SH3BP5	0.0453387
POSTN	0.0453387
0	0.0453387
TNNC2	0.0456378
CYBB	0.046171
MYH11	0.0462556
0	0.0462896
CCR7	0.0462896
LGALS9	0.0463652
APOE	0.0463652
ALOX5	0.0463791
TCF21	0.0465267
0	0.0465267
IFIT3	0.0466748
C7orf58	0.0466837
CD27	0.0468613
TSPAN4	0.0468671
MYOC	0.0470796
0	0.0471535
GJC1	0.0472599
RGS11	0.0472718
CXCR4	0.047279
TRAM2	0.047279
SLC16A2	0.0472809
GATM	0.0474766
MS4A4A	0.0474992
KCNB1	0.0478827
C6orf145	0.0479848
C12orf5	0.048037
HSPA12A	0.0480387
MAP3K8	0.048137
LOX	0.0481456
COL21A1	0.0481518
C21orf96	0.0481518
LDHB	0.0486206
TIAM1	0.0486206
0	0.0487549
HPGDS	0.049147
DNASE1L3	0.0492885
DPT	0.0493626
PTPN22	0.0497494
