# Supplementary material for: ESE3/EHF Controls Epithelial Cell Differentiation and Its Loss Leads to Prostate Tumors with Mesenchymal and Stem-like Features
Source: Oxford University Press journal article supplement (doi:10.1158/0008-5472.can-12-0212), 2012-04-14
Supplement: 00085472can120212-sup-t6_xls_161.xls [file 00085472can120212-sup-t6_xls_161.xls]

## Sheet: Sheet3
Supplementary Table 6. Genes up- and down- regulated in ESE3low tumours compared to all tumours (Q<0.05)
Gllinsky dataset
GENES UPREGULATED IN ESE3_Low vs All					GENES DOWNREGULATED IN ESE3_Low vs All
gene name	qvalue>0.05				gene name	qvalue>0.05
UPREGULATED IN ESE3LOW
Genename	qvalue < 0.05				Genename	qvalue < 0.05
PID1	1.2964e-05				ERG	1.2964e-05
PLCL1	5.25519e-05				EHF	1.80894e-05
DKK3	5.9738e-05				REXO2	1.80894e-05
0	9.24487e-05				MYO6	1.80894e-05
KCNMA1	9.24487e-05				RAB11A	2.27409e-05
PRRG1	9.24487e-05				EML4	2.27409e-05
SGCD	0.000120149				CDH1	5.25519e-05
AMOTL2	0.000131274				MYO6	5.25519e-05
TPK1	0.000131274				HSP90B1	5.25519e-05
JAM3	0.000196619				MYO6	5.25519e-05
MYBL1	0.000239217				PPAP2C	5.25519e-05
PIP4K2A	0.000239217				HOMER2	6.02624e-05
CXCR7	0.000245603				CANX	6.02624e-05
TRPS1	0.000296713				CANX	6.02624e-05
LPP	0.000307167				GFPT1	8.10213e-05
BAALC	0.000307167				CACNA1D	8.10213e-05
LAMA4	0.000328396				0	9.24487e-05
RIMS3	0.000328396				STEAP4	9.24487e-05
CCDC25	0.000330932				DSC2	9.24487e-05
AURKC	0.000336895				UBXN4	0.000120149
FOXF2	0.000337008				PLA2G7	0.000131274
PCOTH	0.000337008				PEX10	0.000131274
SERPINB13	0.000342235				HSD17B11	0.000134464
BMP5	0.000427181				SCARB2	0.000169309
ADAMTS5	0.000488173				SLC44A4	0.000172434
HTRA1	0.000494111				C11orf75	0.000173244
PLAG1	0.00049465				RANBP2	0.000182837
CD200	0.000501138				WSB2	0.000184675
TFF3	0.000501838				MRPL42	0.00020239
RBPMS	0.000501838				CSGALNACT1	0.00020239
LMCD1	0.000515971				G3BP2	0.000209645
KCNJ8	0.000545397				MAP7	0.000234387
ZNF277	0.000546572				GCOM1 /// GRINL1A	0.000239217
SFTPB	0.000566208				PRPF4	0.000239217
C4orf31	0.000568269				PEX10	0.000239217
0	0.000580707				F5	0.000239217
0	0.000584944				WASL	0.000239217
INPP4B	0.000589374				GNB1	0.000239217
DDX11	0.000627153				ZNF322B	0.000239217
ALOX15B	0.000627153				MARCKSL1	0.000242026
0	0.000646052				ZMPSTE24	0.000245603
0	0.000646052				ATP9A	0.000245603
CYR61	0.000661166				RERE	0.000245603
ZYX	0.000661166				MAP7	0.000245603
SEMA3E	0.000669094				CCT2	0.000245603
CXCL12	0.000727513				ERG	0.000245603
MSRB2	0.000735433				CBLC	0.000245603
A4GNT	0.000740067				MGST2	0.000296713
FGF7	0.000740067				FAT1	0.000296713
PHLDA3	0.000740067				TLE1	0.000308351
CHAF1A	0.000740067				UBXN4	0.000328396
NASP	0.000754657				NFIB	0.000337008
CAMKK2	0.00081955				DDX17	0.000348028
---	0.000862718				TWF1	0.000348028
BMP1	0.000916146				CBFB	0.000352936
ENTPD1	0.000922028				SCARB2	0.000389982
---	0.000922028				COPA	0.000427181
CRYAB	0.00094965				CPD	0.000427181
KCTD14	0.00094965				ITPR3	0.000433629
GAS6	0.00102827				UTRN	0.000433879
SCG5	0.00102827				PLA1A	0.000438621
ADAP1	0.00102827				CAPN7	0.000462632
TTC23	0.00111021				PDIA6	0.000488173
FGFR1	0.00114218				PDIA6	0.00049465
HEY1	0.00114452				SRPR	0.00049465
TRPC1	0.00115561				HYOU1	0.00049465
LARGE	0.00116				CASP6	0.000499568
RASL11B	0.00119577				SLC11A2	0.000499952
FGFR1	0.00119577				TMED2	0.000515236
CD28	0.00120623				IKBKB	0.000515971
FSTL3	0.00120778				RAP1GAP	0.000522044
NTRK3	0.00120778				SNAP23	0.000537401
HPSE2	0.00120831				COPA	0.000545397
JAKMIP2	0.00121343				SLC39A6	0.000580707
DUSP8	0.00121819				LGALS8	0.000591978
PRKCDBP	0.00122242				SSR1	0.000591978
DHRS9	0.00122987				SEC23IP	0.000591978
OLFML1	0.00125506				NAA35	0.0006005
CR1	0.001259				DDOST	0.0006005
FGF2	0.00127745				0	0.000627153
DMD	0.00127745				SOX9	0.000674226
PLEKHO2	0.00130874				ZNF22	0.000713775
NTRK2	0.00130874				SS18	0.000740067
DAAM2	0.00134277				PTPRF	0.00075665
---	0.00136577				TMED2	0.000760739
DEC1	0.00146242				PPM1B	0.000769738
0	0.00148003				TMC5	0.000777787
SEMA3A	0.00152118				OGDHL	0.000777787
NEU3	0.00157057				SCYL3	0.000783616
GSTM5	0.00163187				ERG	0.00081968
MAFG	0.00170641				QDPR	0.000825223
CTSE	0.00171544				HOXB13	0.000833383
DPEP1	0.00176872				FKBP1A	0.000862718
THSD4	0.00179418				SEPT9	0.000862718
MAP1A	0.00179593				TDRD1	0.000862718
BTG3	0.00179817				0	0.000862718
SEC14L5	0.00185237				PPAP2A	0.000914306
0	0.00185237				MED14	0.000914306
ZNF239	0.00185237				KDELR2	0.000922028
0	0.00186474				RAB11A	0.00096758
FHL1	0.00186474				SPATA2	0.00102827
RFTN1	0.0018874				AMD1	0.00102827
SH3BGRL	0.00192672				F5	0.00102827
COL5A3	0.00194578				MLEC	0.00104818
---	0.00195861				PEX6	0.00108477
LPHN2	0.00198937				SCAMP1	0.00112105
KCNAB1	0.00205378				GHR	0.00112105
DPYSL3	0.0020562				ATP11A	0.00114218
SDC2	0.00206861				HP1BP3	0.00114218
NT5DC3	0.00206861				HDAC1	0.001148
C9orf125	0.00208816				SON	0.0011688
PRELP	0.00209529				BCLAF1	0.00125055
G0S2	0.00221312				SS18	0.00126955
MRPS12	0.00221615				MTUS1	0.0012755
HEPH	0.00226071				PTPN11	0.00127745
CELF2	0.00228588				G3BP2	0.00129169
BDH2	0.00228588				PCSK6	0.00129671
SAPS1	0.00228588				RAB3B	0.00131054
DDX11 /// DDX12 /// LOC642846	0.00228625				GFPT1	0.00141319
KCNAB1	0.00231396				LAMC1	0.00145065
CYB5R2	0.00237031				SSR1	0.00146242
RRAS	0.00238256				TLE1	0.00148003
GPR124	0.00238256				RSL1D1	0.00153834
EFHD2	0.00238256				HSP90B1	0.00154413
0	0.00240655				SEL1L3	0.0016551
RUNX2	0.00243799				COL9A2	0.00168074
MYO15B	0.00244535				FAM21A /// FAM21B /// FAM21C /// FAM21D	0.001735
CD200	0.00252541				CDK19	0.00174593
FILIP1L	0.00252541				KCNN2	0.00175094
BNC2	0.00252541				CWF19L1	0.00176866
BMP5	0.00252541				MAPK6	0.00176872
FST	0.00253358				CD24	0.00179593
KCNAB1	0.00262705				STK39	0.00182714
SPARC	0.00262705				ATP6V1A	0.00185237
FST	0.00262705				CUL7	0.00185237
FBN1	0.00275744				GUCY1A3	0.00185237
MST4	0.00280162				NUDT9	0.00194578
GLI3	0.0028328				C6orf62	0.00198937
KIAA1751	0.00288717				ATG12	0.002057
MAP7D3	0.00289004				PTPRK	0.002057
TAC3	0.00290609				SCAMP1	0.002057
CD83	0.0029158				BCLAF1	0.00206861
DPYSL2	0.00296675				SEL1L3	0.00212129
ASPA	0.00298832				TMEM8A	0.00214827
SCGB1D2	0.00300376				PDE3B	0.00218919
PCDHGA3	0.00300376				PPIB	0.00228588
ECM2	0.00300376				SLC30A5	0.00229907
KCNMB2	0.00308034				FBXO38	0.00232574
RARRES2	0.00308034				0	0.00252541
SAMD4A	0.00311855				CD24	0.00252541
GAS6	0.00317507				CAPRIN1	0.00252541
COL5A1	0.00317816				NSF	0.00252541
ACOX3	0.00317816				SIX1	0.00253358
FXYD1	0.00317816				DDX3X	0.00262705
PSIP1	0.00317816				TRAM1	0.00262705
NFASC	0.00318192				MFSD6	0.00262705
CELF2	0.0032268				IGF2R	0.00279442
SERPINE2	0.00323445				PDIA4	0.00279442
MAPK10	0.00332084				PREP	0.00288717
GPR20	0.00332255				GJB1	0.00290609
PPP1R12B	0.00335697				FOXD1	0.00300376
RECK	0.00337069				ZKSCAN1	0.00305747
CXCL12	0.00342493				SYNCRIP	0.00311813
PTN	0.00350383				FKBP1A	0.00311855
CAP2	0.0035201				CDK19	0.00317816
0	0.0035201				GPR116	0.00318192
SYNE1	0.0035201				0	0.00342974
GYPC	0.00353444				TSC2	0.00345125
GP9	0.00361641				ST6GAL1	0.00349454
PGLYRP4	0.00361961				BNIP1	0.00350189
VCL	0.00361961				NDRG1	0.0035064
SRPK3	0.00361961				DSC2	0.0035201
IGFBP6	0.00366643				HEXB	0.0035201
PITPNC1	0.00367875				EPCAM	0.00353444
FEZ1	0.00379766				PPM1H	0.00360207
TNIK	0.00383731				LMAN1	0.00361488
NAV3	0.00390085				C2orf24	0.00362828
0	0.00390085				IFNGR1	0.00362828
---	0.00390085				ATP8A2	0.00363344
PTPRM	0.00390085				NET1	0.00378876
PSG9	0.00392815				MPZL1	0.00379766
RND3	0.00392815				NBPF10	0.00383988
TNN	0.00398702				PXN	0.00387139
DTNA	0.00399503				0	0.00387139
0	0.00401213				GLB1	0.00388436
SSX2IP	0.00401532				LAMC2	0.00390085
LOH3CR2A	0.00401532				NIPA2	0.00390692
HSPB2	0.00406035				POM121 /// POM121C	0.00392815
FRY	0.00406035				GOLGA2	0.00392815
COL14A1	0.00409733				PLA2G4C	0.00401213
MPPED2	0.00414019				CPD	0.00401213
0	0.00415933				M6PR	0.00406035
CERK	0.00415933				WSB2	0.00406035
BACH2	0.00415933				PTPRF	0.00408381
PPP4R4	0.00415933				USO1	0.00408381
TBX2	0.00415933				AGR2	0.00409272
TAS2R14	0.00416236				0	0.00413842
ID4	0.00429475				TMBIM6	0.00416236
COL5A3	0.00431871				NKAIN1	0.00416236
ATP1A2	0.00431985				KIAA1324	0.00424431
TLE4	0.00431985				APLP2	0.00425543
VWA5A	0.00431985				ECE1	0.00431985
PZP	0.00439753				NUMA1	0.00437488
DNAJB4	0.00439753				PDIA3	0.00437488
C2orf43	0.00439753				DIMT1L	0.00437919
FAM65B	0.00450792				TRIM14	0.00454815
FBXL7	0.00457437				ATP11A	0.00456933
C1orf61	0.00470367				RIOK3	0.00460502
ZNF492	0.00470367				TP53	0.00460502
G6PC2	0.00476551				GGT1	0.00469523
VGLL3	0.00476909				AMD1	0.00470367
GAGE3	0.00488379				ARSD	0.00471098
TNFAIP8	0.0049211				SCD	0.00472352
GATM	0.00496092				SLC37A1	0.00475439
FOXF1	0.00501214				MPP5	0.00476909
TGFB3	0.00504385				UBE2E3	0.00492195
CLU	0.00506544				ITGA6	0.00495345
SLITRK3	0.00506544				AMACR /// C1QTNF3	0.00501214
TIMELESS	0.00506544				TOM1L1	0.00501286
CCND2	0.00507026				SEPT8	0.00515049
FHL1	0.00509553				COPE	0.00519073
EHD2	0.0051484				ORC5L	0.00525334
AGRP	0.00525968				TMED5	0.00530551
HMGA2	0.00526776				CALR	0.00559779
AOC2	0.00530551				CD164	0.00588985
CAMK2B	0.00530551				IL17RC	0.00592824
PCOLCE2	0.00532088				PON2	0.00595657
FAM129A	0.00544103				CBX3	0.00605636
FANCC	0.00544103				NIPBL	0.00606004
RBM12B	0.00563188				FGF13	0.00606004
TINAGL1	0.0056418				SCYL3	0.00606004
KRT6A	0.00569483				MCFD2	0.00606004
C9orf3	0.00569595				ATP5S	0.00606004
DACT1	0.00572057				PDIA6	0.00612047
PNMA1	0.00575284				CANT1	0.00615533
SPON1	0.00587947				DLG1	0.00616029
MAP1B	0.00587947				UBE2G1	0.00618587
GPR35	0.00589181				C12orf52	0.00618587
TSPAN4	0.00589181				MARCH6	0.00618587
FRZB	0.00589181				DNAJC10	0.00618587
APOB	0.00589181				KLK11	0.00628484
PDGFB	0.00592824				RAB11FIP1	0.00629782
SIX2	0.00592824				PART1	0.00631895
PCSK5	0.00592824				RGS10	0.00635972
SERPING1	0.00592824				SCD	0.00635972
RXRG	0.00602096				DKC1	0.00638207
SYCP1	0.00602096				ITPR3	0.00638207
SEMA7A	0.00602523				ASS1	0.00642151
SH3BGRL	0.00602523				FXR1	0.00651913
HPS1	0.00602523				TPD52	0.00656358
TLE4	0.00602847				USP1	0.00659343
LPIN1	0.00604911				PPAP2A	0.00673998
ALDOC	0.00604911				0	0.00674039
EGFL6	0.00605026				SLC26A2	0.00679424
CABYR	0.00605636				GGTLC1	0.00689626
PALLD	0.00606004				PDE9A	0.00700702
0	0.00606004				CD164	0.00704685
C21orf7	0.00606004				BAT1	0.00706155
KIAA1654	0.00606004				SFRS7	0.00709797
TGFBR3	0.00608315				GGT1	0.00710301
SLC17A1	0.00609907				KIAA0652	0.00715847
RLBP1	0.00611481				UBE2J1	0.00718109
GABRR1	0.00612047				PRRC1	0.0071883
PAGE4	0.00612047				JMJD7 /// JMJD7-PLA2G4B	0.00719064
---	0.00612047				BIK	0.00719064
S100A4	0.0061366				FFAR2	0.0072599
RASGRP2	0.00615533				GTF3C2	0.0072599
PEG3	0.00615533				STIP1	0.0072599
---	0.00615533				YWHAE	0.00729324
MAST3	0.00615876				AP3D1	0.00729324
CLU	0.00615876				ACSL3	0.00735658
GBP2	0.00615876				GOLGA2	0.00739839
AFF2	0.0061732				GPR172A	0.00747395
ARHGEF7	0.0061732				C9orf156	0.00747395
SLC11A1	0.00618587				PDE8B	0.00747395
DKK3	0.00618587				GLO1	0.00747395
SIGLEC6	0.00618587				CALU	0.00756784
GRIP2	0.00620147				PCYOX1	0.0076251
PPP3CC	0.00620147				SEPT9	0.0076251
LOC100293160 /// PPIA	0.00621712				CACNA1D	0.0076251
DTX2	0.00624293				LRIG1	0.00764719
FERMT2	0.00626348				GGT1	0.00768489
C6orf35	0.0062805				LGALS8	0.00779054
MAST4	0.00628484				ODC1	0.00785286
DUSP10	0.00630065				0	0.00789076
PRKCA	0.00631487				0	0.00789304
ARID4B	0.00635972				RAB27B	0.00793137
C3orf14	0.006418				---	0.00793137
SLIT2	0.00642069				APLP2	0.00793947
PCSK5	0.00642069				FAM21C /// FAM21D	0.00793947
DKK3	0.00642069				PIKFYVE	0.00793947
HSPB3	0.00644651				STX16	0.00793947
TCF7L1	0.00645691				MAP7	0.00793947
CDH2	0.00651893				UGDH	0.00793947
---	0.00655945				TJP1	0.00793947
SPARCL1	0.00656586				ACP1	0.00794039
ITGA8	0.00659138				HLA-DMB	0.00794039
---	0.00659343				PPIB	0.00794039
CALD1	0.00661877				CYBRD1	0.00810056
PTRF	0.00666233				NCALD	0.00810056
ACTA2	0.00667773				MLEC	0.00810256
TNFAIP8	0.00670504				ZNF318	0.00821896
RBMS3	0.00673998				MTMR2	0.00821896
CNR2	0.00674039				TOX3	0.00821896
0	0.00674039				MAZ	0.00845237
SPON1	0.00674039				PRPF4	0.00846296
0	0.00674039				MARCKS	0.00852465
VCX2	0.00674039				PEX11A	0.00864826
DDX11	0.00674039				SENP6	0.00880975
0	0.00675712				SPOCK1	0.00886848
PTGER2	0.0067884				ING1	0.00910563
FAT4	0.00678967				RERE	0.00918922
TCF4	0.00678967				GUSBP3	0.00932255
FXYD6	0.006839				ZFX /// ZFY	0.00935239
EHD1	0.006839				NPTXR	0.00940102
AKAP12	0.00689301				SYNJ2BP	0.00942738
C11orf17 /// NUAK2	0.00689626				AMPD3	0.00956245
PRKCB	0.00700471				CDK19	0.00956245
CHRNG	0.00703928				TFAP2C	0.00964655
---	0.00710301				MANF	0.00964655
CYP2C18	0.00710301				ENSA	0.00964655
PLAGL1	0.00710301				SC5DL	0.00964655
DPT	0.00717521				SLC35E2	0.00967104
TFEC	0.00719064				NUMA1	0.00967104
FMO4	0.0072599				COL2A1	0.00970531
---	0.0072599				GGT1	0.00980225
GRM3	0.00729324				POLM	0.00987187
ABLIM3	0.00729324				LASS2	0.00990079
MMP2	0.00729324				RAB3B	0.00998777
---	0.00730465				HPN	0.0100453
SLC28A3	0.00731474				CYP51A1	0.0100545
---	0.00732723				LGALS8	0.0102448
HYMAI	0.00733204				STT3A	0.0103837
---	0.00737839				EXOSC2	0.0103995
SH3BGR	0.00737839				KCNN4	0.0103995
---	0.00737839				PLIN2	0.0104217
CPS1	0.00747395				ADRBK1	0.0104788
0	0.00747395				HES1	0.0104788
PRELP	0.00747395				SS18	0.0105476
ZCCHC4	0.00747395				CRYL1	0.0105736
SIGLEC6	0.00747395				EBP	0.0106031
PBX2	0.0076251				TSN	0.0108462
---	0.0076251				NCOA3	0.011161
PSRC1	0.0076251				GNS	0.011165
PLK2	0.0076251				MRPL4	0.0111779
RABGAP1L	0.0076251				ARHGAP12	0.0112188
---	0.0076251				SMPD3	0.0112731
CYR61	0.0076251				PSME4	0.0112756
MIPEP	0.00764719				PGM3	0.011279
ACTN1	0.00764761				RB1CC1	0.011279
RCAN1	0.00768489				CCNG2	0.0113878
0	0.00772808				SNAP23	0.0115116
PSTPIP2	0.00773037				TMEM135	0.011529
ACSL4	0.00773037				TMEM63A	0.0115296
ACTN1	0.00776439				NFYA	0.0117635
---	0.00776439				FLNB	0.0117883
ATRNL1	0.00776439				PRSS8	0.0118528
SCD5	0.00776439				DCAF7	0.0118564
WFDC1	0.00785286				KIAA1033	0.0118564
0	0.00789076				TMED10	0.0118564
GFRA1	0.00789076				GTF2I	0.0120279
COG4	0.00789076				C12orf47	0.0122277
SERPINF1	0.00793137				CELF1	0.0123801
RHOBTB1	0.00793947				MARCKS	0.0123942
SLC6A12	0.00793947				PRR16	0.0124129
UST	0.00793947				RBL2	0.012432
RAB30	0.00793947				---	0.0124725
TRAF5	0.00793947				HSPA8	0.0124773
CILP	0.00793947				PRPF40A	0.0125149
COL5A2	0.00793947				LOC100292959	0.0125715
KCNMA1	0.00793947				CREB3L1	0.0127925
VPS13D	0.00793947				0	0.0127925
---	0.00793947				TMOD3	0.0128001
PDZRN4	0.00793947				RHOD	0.012805
COL4A3	0.00793947				LMAN1	0.0128161
L1TD1	0.00793947				PDP1	0.0132002
BEND5	0.00793947				POLB	0.0132472
SYT11	0.00793947				SCAMP1	0.0132472
FLRT2	0.00793947				EXOSC4	0.0132472
ZNF552	0.00793947				LRRC1	0.0132472
IGF1	0.00793947				TMCO1	0.0132472
PRDM5	0.00793947				PCGF3	0.0134158
FRY	0.00793947				LYRM2	0.0134834
MAL	0.00794039				CTBP1	0.0135444
NGDN	0.00794039				HGD	0.0137091
ERBB3	0.00801488				DNAJC3	0.0137091
C1S	0.00801488				NCOA2	0.0137193
ELN	0.00810256				RTCD1	0.0137521
ST7	0.00812627				BET1L	0.0139427
NBL1	0.0081883				SEC61B	0.0139427
KIR3DX1	0.00821896				EZR	0.0139427
FBLN1	0.00821896				ZNF576	0.0139427
NELL2	0.00825437				TGFBRAP1	0.0140839
TRIP6	0.00826151				RABEP1	0.0140839
GAP43	0.00826163				PRKAR1A	0.0141305
COBL	0.00827507				DHCR24	0.0141379
PLA2G10	0.00833908				KIAA0090	0.01424
GJD2	0.00836758				BZW1 /// BZW1L1	0.01428
TMSB4Y	0.00843686				UBE4B	0.0142844
---	0.00843686				RPS6KA6	0.0143873
WNT2	0.00845237				NVL	0.0144389
GIPC2	0.00846296				GALNT1	0.0144667
CD36	0.00846296				PMM2	0.0144869
0	0.00850759				KLHL7	0.0145583
0	0.00852465				CPD	0.0147271
---	0.00852465				PDE3B	0.0147465
FAM38B	0.00853787				PAPOLA	0.0150288
LRRC17	0.00853792				ATXN7L3B	0.0151848
---	0.00871763				CYP39A1	0.0152874
TRAPPC9	0.00871988				JRK	0.0154636
ITM2A	0.00873041				SPATS2L	0.0155426
SEPP1	0.00873314				MRTO4	0.015589
NAT1	0.00875171				ANP32A	0.015589
ZNF280A	0.00875171				PREP	0.0156171
PRNP	0.00880841				TSPAN13	0.0156322
FAIM2	0.00902838				0	0.0156581
---	0.00902838				DNAJC10	0.0157209
AKAP7	0.00909301				ENTPD7	0.0157209
TCP10	0.00910563				GGT1 /// GGT2 /// GGT3P /// GGTLC2 /// GGTLC3	0.0158976
GLT8D2	0.00910563				PKNOX1	0.0159471
ADAM19	0.00910563				MAGED1	0.0160534
---	0.00911594				DSG2	0.0160534
NLGN4Y	0.00911594				MTUS1	0.0168528
S100A6	0.00917823				EPB41L4B	0.0168795
GABRG2	0.00917958				MARCKS	0.0170187
RHAG	0.00918922				TXNIP	0.0170476
CAV2	0.00918922				GPC4	0.0171464
FAM111A	0.00922531				BMPR1B	0.0171464
0	0.00927836				JUP	0.0171464
GRSF1	0.00935239				0	0.0173217
LHX3	0.00935239				FBXL8	0.0173627
LOC100291367	0.00935239				SLC35A3	0.0175881
0	0.00935239				GLTP	0.017621
APOM	0.00936122				ERCC1	0.0176381
STAG3L4	0.00936122				PLEKHB2	0.0176527
FBLN1	0.00938536				HSPA5	0.0176527
NR4A1	0.00945567				MCF2L	0.0178545
GPM6B	0.00945567				APLP2	0.0179081
NRCAM	0.00946729				YWHAZ	0.0179081
SEPT11	0.00946729				GOLGA2	0.0179716
CDC42EP3	0.00948199				SERBP1	0.0180679
TYR	0.00948199				TM7SF2	0.0182696
CPA2	0.00948199				OSBP	0.0183945
ZNF268	0.00949209				UCK2	0.0184324
LTBP2	0.00950765				SLC35E3	0.0185832
BCAN	0.00951441				CHD1L	0.0185993
TRPC1	0.00957058				WWC1	0.0187209
FRAS1	0.00964655				PRPF31	0.0187418
HSPB1	0.00967104				MGEA5	0.0188573
RASL12	0.00969695				SMPD1	0.0191571
PTGIS	0.00971271				KLHL9	0.0192179
CLU	0.00980225				GFOD2	0.0192346
CES1	0.00980225				0	0.0194374
ITM2C	0.00980225				ASB6	0.0194542
SYT11	0.00986404				HES1	0.0194637
---	0.00986404				ACSM3	0.019489
---	0.00986404				CDR2L	0.0196188
NBL1	0.00986404				SOX9	0.0196294
LPHN1	0.00987187				INSM1	0.0196294
C1R	0.00989093				PSMC4	0.0197515
TBX2	0.00990079				MRPL35	0.0200355
ZFPM2	0.00998777				NBN	0.0200705
GUCA1A	0.00999784				0	0.0200931
---	0.010018				SNX19	0.0201319
STAC	0.0100453				SOX4	0.0201319
RASGRF1	0.0101163				LSR	0.0204261
SYNC	0.0101366				ARFGAP3	0.0206249
ARL17A /// LOC100294341	0.0103837				SMARCA1	0.020655
TNIK	0.0103837				PAWR	0.020881
---	0.0104276				MED6	0.020881
---	0.0104355				EIF5	0.0208817
AUTS2	0.0104788				HTATIP2	0.0209263
SH3BP5	0.0104788				N6AMT1	0.0209449
C11orf21	0.0104788				UTRN	0.0209586
C8orf30A	0.0105471				AMACR /// C1QTNF3	0.0210273
---	0.0105736				CYP20A1	0.0212583
OR12D3	0.0105736				SNAP29	0.0216415
ITGB3	0.0105736				TMEM63A	0.0218651
GPLD1	0.0107405				TTC3	0.0218687
NTRK3	0.0107405				RANBP2	0.0218811
EPHA3	0.0107405				TAPBP	0.0219053
LEFTY1	0.0107405				CHRM3	0.0219623
PDLIM1	0.0108146				ENPP4	0.0219939
GLS	0.0108507				MSH6	0.0219983
OLFM1	0.0108507				HTATIP2	0.0221075
CRHR1	0.0109377				GALNT7	0.0221673
PNMA3	0.0109638				MAP6D1	0.0221673
CH25H	0.0109804				PSMD8	0.0221673
HLF	0.0109804				RPLP0 /// RPLP0P6	0.0221962
PPP1R12A	0.0109804				SPTLC2	0.0221962
SOHLH2	0.0109804				BID	0.0223973
COL6A1	0.0109804				CEP76	0.0224335
CCR4	0.0109804				RFC5	0.0225934
RBM12B	0.0109804				APBA3	0.0226526
C9orf40	0.0109804				CPT2	0.0228241
CYP4A22	0.0109895				WHSC1	0.0230321
MAB21L2	0.0109988				ADRB2	0.0231832
CAV1	0.0110198				MAGED4 /// MAGED4B	0.0232602
DPY19L1	0.0110198				SH3YL1	0.023351
CYP2A6	0.0110935				RBM7	0.02342
FLVCR2	0.0111506				BCLAF1	0.0234692
CHRDL1	0.0111779				TMEM110	0.0236893
DISC1 /// TSNAX /// TSNAX-DISC1	0.0112074				GLUD2	0.0236893
0	0.0112184				DLAT	0.0237045
---	0.0112188				FAM198B	0.0237065
KHDRBS1	0.0112731				SMARCC1	0.0237243
WHSC1L1	0.0112756				LGALS8	0.0238185
COL6A2	0.0112756				HOXA5	0.0238943
SYT1	0.0112756				AMACR /// C1QTNF3	0.0238943
ARHGEF1	0.0112799				OAT	0.0238943
GYPB	0.0112799				KIF16B	0.0238943
MAST2	0.0113878				0	0.0240728
ADCY2	0.0113878				ANK3	0.0242502
0	0.0113878				ARF6	0.024255
RUNDC3A	0.0114098				SLC7A1	0.0243391
MBNL1	0.0114144				PSMB4	0.0244537
MYOC	0.0114144				PTK7	0.0244537
HPS1	0.0114144				0	0.0244554
EFEMP1	0.0114144				EIF4EBP1	0.0244703
---	0.0114348				ARNT2	0.0246046
PCOLCE	0.0114453				BAG5	0.0246637
SLC24A3	0.0114818				TKT	0.0246851
IVL	0.0114818				PRDM2	0.0246851
ENPEP	0.0115116				DDX3X	0.0247122
NFASC	0.011529				NAA15	0.0247366
FZD7	0.011529				---	0.0247366
---	0.0115404				RAP1GAP2	0.0247381
ADAMTSL3	0.0115964				GP2	0.0254584
IGF1	0.0116708				IRX4	0.0255287
CUBN	0.0117002				SFRS9	0.0256313
---	0.0117274				KCNS3	0.0256313
ZNF804A	0.0117633				ESRP1	0.0256479
---	0.0117764				TFAP2A	0.0257361
NR6A1	0.0117918				KLK12	0.0258087
GPM6B	0.0117996				C4A /// C4B /// LOC100292046 /// LOC100294156	0.0259319
KIAA1045	0.0118528				GNB5	0.0259965
TCTN2	0.0118528				TBX1	0.0262375
FHL1	0.0118564				GULP1	0.0262912
TNFSF9	0.0118569				NEAT1	0.0263754
SNTG1	0.0118581				BCOR	0.0263773
OVGP1	0.0118581				SAT1	0.0265749
TNFRSF8	0.011873				FOXO3 /// FOXO3B	0.0266939
MEF2C	0.0119758				IL13RA1	0.0268708
ATP1A2	0.0119758				PEX13	0.0269256
SASH3	0.0119808				TRAPPC4	0.0270156
PTGER4	0.0120279				KIAA0776	0.027057
OPCML	0.0120279				TMEM63A	0.0271306
---	0.0120279				ING1	0.0271331
PLAGL1	0.0120279				0	0.0271553
RBPMS	0.0120449				TMSB15A	0.0271839
0	0.0120454				TMC6	0.0272131
0	0.0121023				SART3	0.0272826
TRPC6	0.01211				AQP3	0.0273435
EFEMP2	0.0121284				C8orf55	0.0273435
PLEK	0.0121284				RRBP1	0.0274552
SLC1A2	0.0121511				GP2	0.0276555
NR5A2	0.0122277				---	0.0277761
ENO2	0.0122319				ZNF335	0.0278672
---	0.0123286				SHMT2	0.0282849
LAX1	0.0123286				DNASE2B	0.0282855
0	0.0123286				CCDC6	0.0284229
SPG20	0.0123316				SH3BGRL3	0.0284871
RBPMS	0.0123703				FKBP5	0.028586
SLC2A3	0.0123801				RBM8A	0.0287541
PROM1	0.0123942				ZNF557	0.0287596
POTEKP	0.0123942				TOX3	0.0287596
---	0.0124099				H2AFY2	0.0287596
TIMP3	0.0124099				C1orf144	0.0290027
TSNAXIP1	0.01241				PIGO	0.0290275
EHD1	0.0124129				TBXAS1	0.0290275
IFFO1	0.0124129				SELT	0.0290275
MTMR9	0.0124129				ZNF814	0.0291097
ITPK1	0.0124129				CENPN	0.0291511
DYNC1I1	0.0124725				SEC23B	0.0291832
FGF9	0.0124924				NCLN	0.0292988
TRPM3	0.0124942				SLC25A36	0.0293431
NAP1L3	0.0125136				PDIA5	0.0293905
LARGE	0.0125136				NPY	0.0294637
KCNMB1	0.0125149				ACO2	0.0296063
---	0.0125149				SORL1	0.0297525
---	0.0125149				SPHK2	0.0298506
PDLIM7	0.0125149				ABI2	0.0301054
CLEC1A	0.0125224				PLEKHB2	0.0301054
KCNC3	0.0125326				OCLN	0.0302278
---	0.0125715				ZXDC	0.0302278
GML	0.0127812				CRYBB2 /// CRYBB2P1	0.0304939
C18orf22	0.0127812				C19orf6	0.0304939
SCN11A	0.0127812				SUB1	0.0306237
0	0.0127914				C14orf104	0.0306551
ERAP1	0.0127925				---	0.03067
HSF2BP	0.0128001				KIAA0100	0.0306803
LMOD1	0.0128577				KBTBD4	0.0306803
LRTM1	0.0128577				REEP5	0.0308707
0	0.0128891				SLC3A1	0.0309112
AAK1	0.0128959				ILF3	0.0309112
DLC1	0.0128959				---	0.0311108
CDH2	0.0128959				PGK1	0.0313455
CRHR2	0.0129109				CRELD2	0.0315967
TNFRSF1B	0.0130057				METTL8	0.0317197
HAVCR1	0.0130189				NCSTN	0.0318288
TGFB2	0.0132002				MPPE1	0.0318907
GPM6A	0.0132198				SRP72	0.0319837
0	0.0132203				GUSB	0.032023
PTN	0.0132203				NFIB	0.032292
0	0.0132394				VRK3	0.0325049
RGS19	0.0132472				CLDN3	0.0325049
CEP68	0.0132472				PLXNB3	0.0325099
RBP1	0.0132472				NADK	0.0325099
PDE3A	0.0132472				BCKDHB	0.0325099
CELF2	0.0132472				ZC3H11A	0.0325099
GRM6	0.0132472				PDLIM5	0.0325099
EDAR	0.0132472				SLC33A1	0.0326657
0	0.0132472				FOXO3 /// FOXO3B	0.0326818
TBL1X	0.0132472				MED1	0.0327343
NCF1C	0.0132472				SERGEF	0.0330922
HIF3A	0.0132571				GOSR2	0.0331398
ENPEP	0.0133318				SOAT1	0.0331398
MAST4	0.0133318				PPP1R3D	0.0333957
PHTF2	0.0133404				SMARCA5	0.0336297
SSX2IP	0.0134026				TIMM17A	0.0336354
0	0.0134265				PGK1	0.033745
ZNF816A	0.0134834				CWH43	0.0338065
STAT5A	0.0135444				0	0.0339828
ADAMTS1	0.0135534				HIPK3	0.0339849
SH2D3C	0.0135975				0	0.0339849
ST8SIA1	0.0136065				PRUNE2	0.0339849
IRF4	0.0136897				ARMC1	0.0339849
AGMAT	0.0137098				FAM189B	0.034176
---	0.0137129				TAF1D	0.0342353
---	0.0137521				FAM82B	0.0343051
---	0.0137521				IFIH1	0.034533
---	0.013778				PODXL2	0.0345432
0	0.0138729				CELSR3	0.0346178
EFHC2	0.0138729				ADCY1	0.034674
RCAN2	0.0138776				KDELR3	0.034674
---	0.01388				ZNF24	0.034674
GCNT4	0.0138897				ARHGDIA	0.0347035
TRIM48	0.0139182				NKX2-8	0.0347035
NDE1	0.0139182				TOP1	0.0347871
ATP8B4	0.0140839				IGF2R	0.0348575
GPM6A	0.0140839				MTRR	0.0348575
CA1	0.0140839				STEAP1	0.0349007
GALNT8	0.0140839				0	0.0349007
KLF12	0.0140997				C1orf116	0.0349014
SCN10A	0.0141531				CWH43	0.0349337
BAIAP2	0.0142618				TSR1	0.0350392
PLS3	0.0142659				PKP4	0.0350392
---	0.01428				SHC1	0.0352118
ANK2	0.01428				CSDA	0.0352118
---	0.0142844				TOMM22	0.0352118
PON3	0.0143385				DERL1	0.035313
0	0.0144072				GATA2	0.0353546
MBD2	0.01443				EXOC3	0.0353546
PARD3	0.0144389				RNF141	0.0355547
DLC1	0.0144389				GP2	0.0355597
WDR52	0.0144538				TARBP1	0.0356795
---	0.0144538				CRK	0.0358353
GYPB	0.0144667				PPYR1	0.035847
OSR2	0.014531				TESC	0.0360393
NPR3	0.0145583				ELF3	0.0360393
PIK3CD	0.014585				ZNF780A /// ZNF780B	0.0361579
CXCL13	0.014585				0	0.0361894
DPY19L1	0.0146148				SNAPC1	0.0362375
MYO1C	0.0146211				ATF6	0.0362375
RICH2	0.0146654				EIF2S3	0.0362616
0	0.0147226				PDE3B	0.036355
HOXD13	0.0147451				ABCC3	0.0363987
PTCRA	0.0147451				UQCRFS1	0.0364305
MYBPC1	0.0147451				CDH7	0.0366863
MED31	0.0147639				KLHDC10	0.0367617
---	0.0147981				BRD2	0.0371152
ID4	0.0148181				0	0.0371985
PSG6	0.0148268				FASN	0.0372719
REG3A	0.0149643				HSPH1	0.0373753
LIMS2	0.01503				RPE	0.0375144
NCAPD3	0.01503				CHRD	0.0375144
ENTPD1	0.0151416				ATR	0.0375144
PARVA	0.0151611				0	0.037537
TMEM90B	0.0151848				NUS1P3	0.0376856
GRIN2B	0.0151848				TCF3	0.0376856
POLR2A	0.0151848				CASD1	0.0376856
LAMA4	0.015197				HSPA8	0.037722
CCR10	0.015197				PPA1	0.0378992
ATP6V1D	0.015197				ARHGDIB	0.0380706
PPP3CC	0.0152874				SNX1	0.0381771
---	0.0153587				ARFGEF2	0.0381806
SERPINB9	0.0154508				ADRBK2	0.038254
LRCH4 /// SAP25	0.0154612				TSPAN12	0.0382626
C5orf23	0.0154636				ITGA6	0.0384713
---	0.0154636				TSTA3	0.0385079
NAA11	0.0154636				CAST	0.0385329
KAZALD1	0.0155426				ZNF76	0.0389335
MAMLD1	0.015589				HIST3H2A	0.0390651
VEGFC	0.0156397				ACLY	0.0390651
MFAP4	0.0156486				CNOT3	0.0390651
LOC442381 /// LOC650293 /// OR7E87P	0.0156486				OBSL1	0.0393162
EPHA7	0.0157209				GMNN	0.0394072
PLAGL1	0.0158086				IL7	0.0394225
ITIH5	0.0158086				CASP8	0.0396792
SEMA5A	0.0159024				RABL2A /// RABL2B	0.0397084
IER5	0.0159141				SLC12A2	0.0398518
TAGLN	0.0160852				AP4M1	0.0398518
TMF1	0.0161263				0	0.0398518
RARB	0.0161263				CHN2	0.0398748
TBX1	0.0161265				CCNL2	0.0398748
IRAK3	0.0161661				---	0.0398748
ACSL6	0.016261				PKN1	0.0399657
TNS1	0.0163177				GNS	0.040318
ACSM5	0.0163195				ST14	0.0408008
WNT2B	0.0163284				NCBP2	0.0408008
MYO7B	0.0163342				GOLT1B	0.0408747
MRC2	0.0164204				UBE2H	0.040914
CALD1	0.0165939				ZDHHC11	0.040941
STOM	0.0166103				SMAD5	0.040941
KLF12	0.0166103				SYPL1	0.0409724
0	0.016673				0	0.0412073
KCNAB2	0.016673				TMEM50B	0.0412073
TCF20	0.0166828				CDK7	0.0413546
CEACAM5	0.0167095				TAF9B	0.0415804
TNFRSF25	0.0167461				SLC25A36	0.041605
A2M	0.0167914				TM4SF1	0.0416225
IGF1	0.0168002				PSMD4	0.0416743
MPP3	0.0168248				ADAM9	0.0418367
COL4A6	0.0168349				TOX3	0.0418921
CYP3A43	0.0168605				ACSL3	0.0419522
IGF1	0.0169771				SEZ6L2	0.0421693
TUBA1A	0.0170503				TREX1	0.0423669
TMEFF1	0.0170753				PRKD1	0.0425309
SACS	0.0171464				GLRX	0.0425404
GAS7	0.0171464				ABT1	0.0428301
0	0.0172242				0	0.0428457
NTN1	0.017239				---	0.0428567
CLDN6	0.0173776				IGF1R	0.0428969
GABBR1	0.0173957				F3	0.0433136
RRAD	0.0173957				SAC3D1	0.0433409
0	0.0174778				TFAM	0.0433745
DNAH3	0.0175881				NUCB2	0.0433745
GLT25D2	0.0175959				SHANK2	0.0434013
CHI3L2	0.0175959				LIPT1	0.0437385
C1QTNF1	0.0175959				TPD52	0.044159
TNFAIP6	0.0175992				SPTLC1	0.044173
SMAD5OS	0.0175996				ATP8A1	0.0443528
PLXND1	0.0176183				LSM12	0.0444128
COL21A1	0.0176516				SMARCA4	0.0445978
C14orf45	0.0178057				SSR3	0.0445978
LOC100287927	0.0178057				HEMK1	0.0446208
EPB41L2	0.0178638				---	0.0447758
PDCD4	0.0178638				BHLHE41	0.0448407
TTC28	0.0178645				CASK	0.0449712
CADPS	0.0179475				TRIO	0.0453041
RPS6KA5	0.0179503				RNF10	0.0453041
NR4A3	0.0179503				C8orf44 /// SGK3	0.0453041
---	0.0179911				LRRC31	0.0453562
H2AFX	0.0180093				PPM1B	0.0455663
COL1A2	0.0180127				ZER1	0.0456032
MYO1A	0.0180127				MPZL1	0.0456933
LOXL1	0.0180127				POLR2J2	0.0457088
SLC16A7	0.0180435				C4A /// C4B /// LOC100292046	0.0458506
JAM2	0.0180679				CD2AP	0.0460272
AGXT2L1	0.0180679				ENO1	0.0460272
ACAN	0.0180679				BCAM	0.0462022
---	0.0180679				FAM38A	0.0462022
HAUS7 /// TREX2	0.0181199				ARF3	0.0462022
SPN	0.0181275				CCDC76	0.0462022
---	0.0181275				ABCA2	0.0462022
KALRN	0.0181907				KIAA1033	0.0462059
RNF122	0.0182002				0	0.0464759
---	0.0182057				ENOSF1	0.046841
LOC100290658 /// LRCH4 /// SAP25	0.0182057				PIP5K1A	0.0468842
RGS3	0.0182167				TFAP2C	0.0468842
COL16A1	0.0182167				SLC30A4	0.0468842
BRCA1	0.0182696				0	0.0469148
NXPH4	0.0184309				TOLLIP	0.0469949
CDC5L	0.01849				COPG	0.0471408
LHFPL2	0.0185231				CUX2	0.0471438
PAK3	0.0185338				EZR	0.0473156
PIP4K2A	0.0185791				C1QBP	0.0476486
CDKN1C	0.0185826				SRRT	0.0478651
DRD2	0.0185961				FZD5	0.048024
SNAP25	0.0185961				ATP13A2	0.048024
ENTPD1	0.0185961				HDAC2	0.0481499
TAAR2	0.0185961				SLC27A2	0.0481499
GPR153	0.0185993				LAMP2	0.0482168
SEMA3F	0.0185993				TPPP	0.0482319
MYCL1	0.0185993				ADAM10	0.0482567
COL4A2	0.018647				USP34	0.0485294
RASIP1	0.018647				SIPA1L3	0.0486436
SPTBN5	0.0186763				PVT1	0.0487414
MTMR11	0.0186776				SEPT9	0.0487946
PLAU	0.018694				ZKSCAN1	0.0488672
EGR2	0.0187209				NUP210	0.0489584
HDGFRP3	0.0187209				GLUD1	0.0492382
RECK	0.0187209				GCLM	0.0492576
EPB41L1	0.0187809				C17orf101	0.0494178
C5orf45	0.0187809				LRP5	0.0497139
LRRC15	0.018837				ITFG1	0.0497139
CD28	0.0188573				AKIRIN1	0.0498526
CFLAR	0.0188573
LILRP2	0.0189658
PHOX2B	0.0189658
DENND1A	0.018994
OPHN1	0.0189995
ADM2	0.0190933
EPB41L3	0.0192346
0	0.0192346
COL4A3	0.0192652
NTRK3	0.0192861
FAM107A	0.0193249
NID1	0.0193634
FBLN1	0.0194126
CLDN9	0.0194261
TRIL	0.01944
THBS2	0.0194473
PRKCB	0.0194637
SRF	0.0194712
---	0.019489
BAGE	0.0195473
SIGLEC15	0.0195473
---	0.0195473
HSD11B1	0.0195473
VPREB3	0.019563
ADORA1	0.0196188
COL5A1	0.0196188
KCNB1	0.0196294
DNAH9	0.0196294
STXBP6	0.0196436
PSG4	0.0196436
LPAR1	0.0196436
LRDD	0.019644
USP2	0.0196908
HFE	0.01973
GDF10	0.0197515
THY1	0.0197515
ARL3	0.0197515
PPFIBP1	0.0198144
HLF	0.0198144
TGFB1I1	0.0199007
NPY5R	0.019938
ANGPTL2	0.0200705
LGALS14	0.0200931
KLF6	0.0200931
SORBS1	0.0201238
NPR2	0.0201238
SEMA3G	0.0201319
---	0.0201508
0	0.0202086
CCR2	0.0202451
CTRB2	0.0203156
NCAM2	0.0203156
CTGF	0.0203458
MCM3APAS	0.0205479
F13A1	0.0205479
---	0.0205479
CATSPERB	0.0206168
SGCD	0.0206249
CYP2A6	0.020641
CAV1	0.0206487
COL11A2	0.0207105
HBEGF	0.0207105
MET	0.0207105
PDGFRA	0.0207105
MCAM	0.020751
TNXB	0.020751
TIMM17A	0.0207719
COL6A1	0.0207719
REEP4	0.0208355
OR1D2	0.0209263
PCDH7	0.0209263
0	0.0209263
NTRK3	0.0209263
0	0.0209263
MC1R	0.0209263
INPP5D	0.0209263
GTDC1	0.0209263
---	0.0209651
C5orf13	0.0210273
PGAP1	0.021045
0	0.0210879
MKI67	0.0210879
INSL3 /// JAK3	0.0211804
0	0.0212311
0	0.0212583
KANK2	0.0212583
SDC2	0.0213026
SPATA2L	0.0214217
FHL1	0.0214217
ADCYAP1	0.0214438
IFNA10	0.0215514
COX7A1	0.0215664
SCAPER	0.0215664
0	0.0216415
FAM190B	0.0216415
NOD1	0.0216415
ILK	0.0217121
---	0.0218687
VAMP1	0.0218917
CA14	0.021893
ADAM22	0.0219053
CYP2A6	0.0219081
MFSD7	0.0219311
0	0.0219311
JAK3	0.0219939
GRIK1	0.0219939
DCN	0.0219983
UBE2C	0.0220841
TCL1A	0.0220938
FOXO1	0.0221075
MAST2	0.0221075
DHODH	0.0221673
LAMA2	0.0221673
DMD	0.0221673
PLA2G5	0.0221725
MTAP	0.0221794
HEG1	0.0221962
LYZL6	0.0223735
GPATCH4	0.0223735
IL2RB	0.0224412
PTPRH	0.0224749
SEC14L4	0.0224801
IL5RA	0.0225403
DENND2A	0.0225934
MEF2C	0.0225934
ST5	0.0225934
SIRPG	0.0225934
TNFRSF10B	0.0225934
RPS6KA5	0.0226925
MADCAM1	0.0227117
RGS13	0.0227245
METTL7A	0.0227397
MIER2	0.0227537
FGF2	0.0227897
---	0.0227897
---	0.0228362
PMP22	0.022908
CTRC	0.022973
STAB1	0.0230659
CPA4	0.0230702
DTNA	0.0231832
CIDEC	0.0231832
CYP1A2	0.0231832
TLN2	0.0231832
TBPL1	0.0231887
LOC100289473 /// LOC100294049	0.0232103
SLC2A9	0.0232602
ACOX3	0.0233008
0	0.0234191
ASIP	0.02342
MYLK	0.0234575
CLN8	0.0234692
ACSS3	0.0234692
ABCC9	0.0235936
TACR2	0.0236677
FBN2	0.0236677
FIGF	0.0236677
0	0.0236677
ZIM2	0.0237065
PDE5A	0.0237065
RUNDC3A	0.0238185
PALM	0.0238185
HEG1	0.0238943
NIPSNAP3B	0.0238943
CTTN	0.0238943
NF1	0.0238943
IFNA7	0.0238943
WNT5A	0.0238943
EEF1D	0.0239832
KDM6B	0.0239832
MUC5AC	0.0239832
ADCY8	0.0240496
AGBL2	0.0240496
---	0.0240496
CLDN17	0.0240736
ACTN2	0.0241267
RAD51L3	0.0242502
EYA1	0.0242502
LDB3	0.0242502
CHRNB3	0.0242991
---	0.0243306
SPOCK3	0.0243454
APC	0.0244378
ZFP2	0.0244537
FLNA	0.0244537
0	0.0244537
LTBP4	0.0244537
ATP10B	0.0244537
C3orf64	0.0244537
ACTN1	0.0244537
KCNAB1	0.0244537
OR10H3	0.0244537
PLP2	0.0244537
TMSB4X /// TMSL3	0.0244537
CELA3A	0.0244537
LY6G6D	0.0244554
S1PR1	0.0244703
DENND2A	0.0244703
LOC100289208 /// PHLDA1	0.0244703
AEBP1	0.0244703
RIOK3	0.0245073
CAPZB	0.0245539
CD300A	0.0245539
CA4	0.0246111
SAMHD1	0.0246401
TMEM35	0.0246637
DBNDD2 /// SYS1 /// SYS1-DBNDD2	0.0247003
FLNA	0.0247003
0	0.0247122
FBLN1	0.0247381
KCNMB4	0.0247381
---	0.0247381
LRRN3	0.0247545
PROSC	0.0247561
ANKLE2	0.0248876
MEIS3P1	0.0249076
B3GNTL1	0.0249272
P2RX6	0.0251618
BAI3	0.0251845
LOC100287008	0.0251943
---	0.0252857
0	0.0253197
DEF6	0.0253261
C16orf45	0.0253261
DDX11	0.0253261
NLGN1	0.0254584
---	0.025468
ADRA1A	0.025468
SMYD2	0.0255338
KIF14	0.0255563
DNM1	0.0255742
SULF1	0.0256267
TRAF3IP1	0.0256313
P2RY4	0.0256313
TPSAB1	0.0256313
GLYAT	0.0256313
NPY2R	0.0256313
NT5E	0.0256387
C12orf48	0.0256463
---	0.0256479
HS3ST3A1	0.0256479
0	0.0257361
CEP135	0.0257485
DNAH7	0.0257994
---	0.0257994
TBXA2R	0.0259439
0	0.0259965
C1orf105	0.0259965
CHST4	0.0260309
COL1A1	0.0261299
SERPINB1	0.0261356
PDGFC	0.0261619
0	0.0262375
ELOVL5	0.0262912
SNAP25	0.0262912
ZNF79	0.0263161
CD248	0.0263161
HLA-DOA	0.0263516
HMGN5	0.0264068
---	0.0264068
TP53TG3 /// TP53TG3B	0.0264068
---	0.026462
CALM1	0.0264718
SPO11	0.0264727
ATN1	0.026678
CD44	0.0267267
MAPK11	0.0267491
TGFB2	0.0267505
KIF3C	0.0267605
DST	0.0268067
MAGEC2	0.0268067
LPCAT4	0.0268334
0	0.0268394
KIR3DS1	0.0268636
SERPINA6	0.0268636
HCG26	0.0268636
CFLAR	0.0268708
LOC100289811 /// LOC441259 /// PMS2 /// PMS2L1 /// PMS2L14 /// PMS2L2 /// PMS2L5	0.0268708
CLDN10	0.0268914
STRA6	0.0270056
AKR1B1	0.0270156
PENK	0.0271116
PSG9	0.0271306
ABCG2	0.0271839
SLC7A7	0.0271839
TRPM3	0.0271988
0	0.0271988
0	0.0272154
ITGA2B	0.0272187
---	0.0272187
GFOD1	0.0273087
LMNA	0.0273361
LOC100287025	0.0273399
UBE2NL	0.0273435
APCS	0.0273435
C7	0.0273437
EDIL3	0.0273487
OGFRL1	0.0274097
PTGS1	0.0275018
FSHB	0.0276513
BMP7	0.0276555
CNTN1	0.0276555
DZIP1	0.0276555
LOC729806	0.027658
EPS8L1	0.0276608
---	0.0277891
PDLIM4	0.0278046
POPDC2	0.0278672
FHL3	0.0278672
CLEC3B	0.0278672
CD40	0.0279494
C22orf24	0.0279906
C11orf41	0.0280269
PGCP	0.0281009
---	0.0281338
NDC80	0.0281696
CYP11A1	0.0282524
WNT6	0.0282524
ADAMTS6	0.0282524
---	0.0284618
MYH11	0.0284618
0	0.0284871
SLC13A3	0.0284871
PTGS1	0.0284871
RAB31	0.0284871
AKAP6	0.028586
MUC2	0.028632
OASL	0.0287261
MYH11	0.0287596
---	0.028783
ADAMTS20	0.028783
HSPB7	0.0288323
GDAP2	0.0288614
TRIM45	0.0289338
0	0.029056
AXL	0.029056
LAT /// SPNS1	0.0290886
RPS6KA6	0.029144
CYP27A1	0.0291692
LILRA2	0.0292309
ULK4	0.0292904
---	0.0292904
DEFA5	0.0292904
CLOCK	0.0293122
BTN1A1	0.0293392
MIPEP	0.0294798
PLN	0.0294897
---	0.0295455
SVIL	0.0295456
CACYBP	0.0295456
MOXD1	0.0295456
BCHE	0.0295781
LDB2	0.0298608
SLC16A1	0.0299063
CYP2J2	0.0299799
INO80D	0.0300214
CSPG4	0.0300214
HTR2C	0.0300982
CYP4F2	0.0301054
QSER1	0.0301054
PRKAR2B	0.0301054
EXTL3	0.0301054
PPEF1	0.0301439
---	0.0301835
COL4A1	0.0302278
SOD3	0.0302403
ADAM21 /// ADAM21P1	0.0303739
AKAP2 /// PALM2-AKAP2	0.0304939
---	0.0304939
---	0.0304939
CHRNA3	0.0304939
NF1	0.0304939
FLNC	0.0305854
DAO	0.0305854
EFEMP1	0.0306329
STXBP5L	0.0306329
C2orf43	0.0306343
ANP32E	0.0306803
CD22	0.0306803
MAP4K1	0.0306919
PLCG2	0.0307429
DCN	0.0307884
BEGAIN	0.030812
METTL7A	0.030911
FKSG2	0.0309112
NR3C1	0.030923
0	0.0312672
MMP27	0.03132
MOS	0.0313228
FLJ10357	0.0313455
ITSN1	0.0313893
ALOXE3	0.0314335
GABRA2	0.0314335
GDPD3	0.0314848
EXD3	0.0315967
NUDT7	0.0315967
ZNF701	0.0315967
ZDHHC8P1	0.0315967
IFNA4	0.0316876
GNAZ	0.0316973
ICAM2	0.0317197
CHEK1	0.0317395
MOSC2	0.0317404
LUM	0.0318907
MPO	0.0318996
CNTF /// ZFP91 /// ZFP91-CNTF	0.031921
RNF17	0.0319291
MEG3	0.0319356
0	0.0319356
DCT	0.0319356
KAZALD1	0.0319886
EPS8L1	0.032023
FAM160B2	0.032023
---	0.0320256
CMKLR1	0.0323165
TUBG2	0.0323574
INHA	0.0323574
KANK2	0.0323867
ADRBK1	0.0324353
EDNRB	0.0325049
GVIN1	0.0325049
NCAM1	0.0325049
HNRNPD	0.0325049
MCAM	0.0325099
SLC28A2	0.0325099
---	0.0325099
CAND2	0.0325099
COL6A2	0.0325099
HSPA2	0.0326911
KRT2	0.0326996
AQP1	0.0326996
COL1A2	0.0327343
SPON1	0.0327695
NRP2	0.0327695
VSNL1	0.0327695
CSF2RB	0.0328122
VAV1	0.0330023
OR5I1	0.0330668
ANXA2	0.0331398
COL6A1	0.03339
APOE	0.0333901
REEP1	0.0333901
ADH7	0.0333901
FOXN3	0.0334044
PSG3	0.0334044
---	0.0334044
AVPR1B	0.0335704
RBP4	0.0336297
LEPREL1	0.0337034
COL1A1	0.0337492
LOC100127972	0.0337613
NFIL3	0.0338287
CHD2	0.0338508
---	0.0339284
PDGFB	0.0339828
CALM1	0.0339849
C11orf20	0.0339849
CCDC85B	0.0339849
DLG5	0.0339849
0	0.0339849
ACSF2	0.0339849
PKNOX2	0.0339849
TAPT1	0.0339849
LAMA2	0.0340745
KCNB2	0.0340755
PIK3R5	0.0342259
CHRNA9	0.0342259
SCO2	0.0342259
KDM6B	0.0343051
KCTD14	0.0343284
GP1BA	0.0344569
---	0.0344569
BTN2A2	0.034533
LRFN3	0.0345432
ADH5	0.0345645
GSTM2	0.0346135
ATP2B4	0.0346135
CLIC4	0.034674
ETV1	0.034674
ETV5	0.034674
SULF1	0.034674
HFE	0.0347035
LOC100287927	0.0347035
TBX2	0.0347035
OR2B6	0.0347552
PDE10A	0.03476
LGALS1	0.03476
DIO1	0.03476
CAPRIN2	0.0347625
SOX15	0.0347711
FZD7	0.0347711
KIF20B	0.0348069
---	0.0348204
---	0.0348357
0	0.0348575
CACNA2D3	0.0348575
HLF	0.0348575
NXPH3	0.034864
ID4	0.0349007
PKNOX2	0.0349007
ZNF362	0.0349097
SCRG1	0.0349813
GJA9	0.0350213
EPS8	0.0350213
ANXA2P3	0.0350392
TMOD1	0.0350392
ARHGEF7	0.0350392
---	0.0350392
PLCE1	0.0350392
COL6A3	0.035092
---	0.035095
0	0.0352118
CG030	0.0352118
FAM65B	0.0352118
SPINLW1	0.0352852
---	0.0353546
SLC24A1	0.0353546
GUCY2D	0.0354151
COL5A1	0.0354423
SLC2A1	0.0354901
TCF21	0.0355539
SPTA1	0.0355547
---	0.0355547
ANK1	0.0355597
FZD1	0.0356132
MED12	0.0356537
PPARGC1A	0.0356537
FASLG	0.0356537
DMXL2	0.0357044
GDF3	0.0357837
ITGB1BP1	0.0358404
CTSK	0.035847
EGLN3	0.035847
PPAP2B	0.0358797
LRCH4 /// SAP25	0.0359071
PRLR	0.0360024
TRPC6	0.0360393
ARHGEF15	0.0360393
CALD1	0.0360559
0	0.036057
EGR1	0.0361185
SPIB	0.0361366
CTSH	0.0361579
SCML2	0.0362375
DSCC1	0.0362616
CSGALNACT2	0.0363052
PER1	0.0363065
LOC100286895	0.0363933
ATP2A1	0.0363933
LRCH1	0.0364305
C2orf43	0.0364305
SLCO1A2	0.0364305
CCND2	0.0364305
NR6A1	0.0364305
SLC15A1	0.0364305
CAP2	0.0364305
NPY2R	0.0364305
LOC100289042	0.0364305
ARMC4	0.0364884
DRD2	0.0366091
HPGD	0.0366339
---	0.0366674
BCL11B	0.0367617
0	0.036795
DICER1	0.036808
HTR2A	0.0370008
IFNA14	0.037017
FOLR2	0.0370184
MCF2	0.0370641
PAPPA2	0.0370641
PLAUR	0.0372719
EDN1	0.0373013
SSX2 /// SSX2B /// SSX3 /// SSX7	0.037362
0	0.0373753
NAALAD2	0.0373753
PDE4C	0.0373798
NPPB	0.0373798
EFR3B	0.0374041
GABRB1	0.0374041
ACOT11	0.0374041
ZNF335	0.0375144
ARHGEF15	0.0375144
ISLR	0.0375144
PYHIN1	0.0375144
CA3	0.0375144
PVRL1	0.0375144
B4GALNT1	0.0375144
TNFRSF10C	0.0375144
---	0.0375144
TAF4B	0.0375144
PPFIA3	0.0375144
NR4A3	0.0375144
SPAM1	0.0375309
ADA	0.0376856
SLC24A2	0.0376856
RHEB	0.0376856
ADAMTSL4	0.0377141
PPP2R2B	0.037722
PAPPA2	0.037722
NMT2	0.0377964
LOC100293532	0.0377964
HUS1	0.0378948
TRPV1	0.0378992
0	0.0380512
ZBTB7A	0.0380706
KCNE1	0.0380706
ADAM5P	0.0380706
NID1	0.0380706
SRD5A1	0.0380706
F8	0.0380706
PIP5K1B	0.038086
DCN	0.0381798
0	0.0383619
IPO9	0.0384264
KLRG1	0.0384264
MEIS1	0.0384264
0	0.0384711
HTR3A	0.0384967
FHL1	0.0385079
---	0.0385079
SLC16A5	0.0385079
FECH	0.0386142
PRY	0.038644
ARAP3	0.0387198
DTNA	0.038856
PRDM16	0.0388712
RAP1GAP	0.0388712
URB1	0.0388937
TNFSF18	0.0389257
TNS1	0.0389257
C6orf105	0.0389257
APOC4	0.0390065
FAM129A	0.0390651
SLN	0.0390808
IGSF9B	0.0391141
FGFR1	0.0392397
HIST1H4G	0.0393162
PHLDA1	0.0393548
SLC5A5	0.0394494
DGKA	0.0394559
TSC22D2	0.0394881
LPIN1	0.03956
TPI1	0.0395706
0	0.039628
MON1B	0.0396349
DCHS1	0.0396541
CORIN	0.0396544
GPM6B	0.0396746
IL13RA2	0.0396792
PTN	0.0396792
FBXO2	0.0396792
NMT2	0.0396792
---	0.0396917
TCEAL1	0.0396917
GPM6B	0.0397308
---	0.0397632
---	0.0397845
SP140	0.039838
SCHIP1	0.0398518
SLC7A9	0.0398522
VCL	0.0398748
FBLN5	0.0398748
HSPA1A	0.0398748
GBP1	0.0398748
UBTD1	0.0398748
CNNM1	0.0398925
0	0.0399447
---	0.0399657
0	0.0399657
PPFIBP2	0.0399657
HFE	0.0399657
CKM	0.0399805
GABRB2	0.0401131
---	0.040123
CHRNA5	0.0401322
TFE3	0.0401579
TRO	0.0401854
ITGB1BP2	0.0401854
SMPDL3A	0.0402105
NFKB2	0.0402593
ULBP1	0.0402723
EMP3	0.0404059
---	0.04045
C1orf38	0.04045
DAB2	0.0406547
MOG	0.0406692
LRMP	0.0406927
TUBB6	0.0406943
0	0.0407388
DLX4	0.0408177
NRCAM	0.0408467
PLSCR4	0.0408467
0	0.0408467
TRPA1	0.0408513
WAS	0.0408747
TRANK1	0.0410799
CCR1	0.041108
CYP2A13	0.0411342
ZNF747	0.0411342
CIT	0.0412073
ACTN4	0.0412354
CYP2C9	0.0412395
PICK1	0.0412863
RIMS2	0.0412863
---	0.0413546
LOC100132247 /// LOC348162 /// LOC613037 /// LOC728888 /// NPIPL3	0.0414082
ATP7A	0.0415154
AGFG2	0.0415154
DPT	0.0415434
TCP10L	0.0415434
SERPINI2	0.0415804
RLN2	0.0415804
TCF4	0.0417104
---	0.0417104
GFPT2	0.0417104
KRT6B	0.0417104
CTSB	0.0417104
OR10C1	0.0417104
LOC100288941	0.0418367
FLJ10357	0.0419035
KCNJ15	0.0419522
AVP	0.0420597
PTPRR	0.0420644
PPFIA3	0.0423824
ACACB	0.042475
RAD51L1	0.0424885
MSH4	0.0425404
---	0.0427859
LTBP1	0.0428969
POM121L2	0.0429053
LOC100293553	0.0429088
PPP2R3A	0.0429088
CD1D	0.0429178
KIAA0101	0.0429332
IL10RA	0.0430905
EHHADH	0.0431191
---	0.0431379
ANK2	0.0431379
ALX3	0.0431936
ENPP2	0.0432214
TBX5	0.0432932
LOC100271836 /// LOC440354 /// LOC595101 /// LOC641298 /// SLC7A5P1 /// SLC7A5P2	0.0432932
FEZ2	0.0432932
SIX6	0.0433136
NES	0.0433136
TMEM45A	0.0433136
---	0.0433189
CASP10	0.0433189
MNS1	0.0433189
LAIR2	0.0433189
ALDOB	0.0433745
0	0.0433745
---	0.0434998
EIF5	0.0434998
EMP1	0.0436671
C19orf40	0.0436733
RGN	0.0437903
0	0.0438417
DAZ1 /// DAZ2 /// DAZ3 /// DAZ4	0.0438614
EFEMP2	0.0439489
CLTA	0.0439489
RAD52	0.044159
ITM2A	0.044159
IGF2BP2	0.044159
DSE	0.044159
STK38L	0.0442551
RNF2	0.0444128
ZNF423	0.0444128
0	0.044555
---	0.0446964
HNRNPL	0.0447479
EFHC2	0.044757
LOC728142	0.0447716
GAGE1 /// GAGE12F /// GAGE12G /// GAGE12I /// GAGE12J /// GAGE4 /// GAGE5 /// GAGE6 /// GAGE7	0.0447758
CD1A	0.0447758
RUNDC3B	0.0448407
HECW1	0.0448407
TMBIM1	0.0448407
AP1S2	0.0448407
TNXA /// TNXB	0.0448407
PTPRZ1	0.0448407
LARP7	0.0448407
ETV1	0.0448407
ALPPL2	0.0448407
TUBB4	0.0448407
HSPA12A	0.0448407
---	0.0449476
DST	0.0449712
SYNGR1	0.0449712
KIF2C	0.0449712
LPPR4	0.0449712
MEP1B	0.0449822
GEMIN7	0.0450097
---	0.0451318
SH3GL3	0.0452336
RASSF2	0.0453041
EPAG	0.0453041
BCMO1	0.0453562
PRAF2	0.0453879
LYST	0.0455663
GSTA4	0.0455699
C7orf68	0.0455858
LTBP4	0.0455858
ADAMTS9	0.0456484
TGFA	0.0456503
MMP16	0.0456503
CCR1	0.0456622
SLC16A2	0.0456622
HCFC1R1	0.0456933
PLD1	0.0457453
EFNB3	0.0458614
ACACB	0.0458614
TRIP11	0.0458756
BEX1	0.04588
CYP7B1	0.04588
DMC1	0.04588
NPAS2	0.04588
LILRB5	0.0459434
BBS9	0.0460272
TMEM189 /// TMEM189-UBE2V1 /// UBE2V1	0.0460272
DUSP9	0.0460272
PALLD	0.0460272
TRPM3	0.0460272
C1orf115	0.0460272
CYP26A1	0.0460904
SH3GL3	0.0462022
ADCY1	0.0462022
OR2B2	0.0462022
EVI5	0.0462022
ARSJ	0.0462022
LOC81691	0.0462022
TNKS	0.0462022
ARHGAP25	0.0462022
FERMT2	0.0462022
PLXNC1	0.0462022
VWA5A	0.0462059
LOC100287163 /// ZNF717 /// ZNF73	0.0462059
0	0.0462059
---	0.0462261
OSGIN2	0.0462703
G3BP1	0.0463015
EDNRB	0.046331
PCDH9	0.046497
DCN	0.0466692
PDXK	0.0467301
HAND1	0.0468554
NID2	0.0468696
ITGA10	0.0468842
---	0.0468842
TAF1	0.0468842
TPM1	0.0469949
0	0.0470103
0	0.0470534
FUT2	0.0470534
SIRPB1	0.0470685
CLCA1	0.0470685
DTNB	0.0471438
PSG2	0.0471438
0	0.0471793
#N/A	0.0472542
C12orf24	0.0473141
0	0.0473641
ETV5	0.0475084
EPOR	0.0475085
---	0.0475221
DEPDC1	0.0475725
FSCN1	0.0475725
HTR6	0.0475731
MMP16	0.0475836
IFNA16	0.0475936
SLCO1C1	0.0475936
OGFR	0.0475984
APBA2	0.0476498
STXBP6	0.0477073
NTRK3	0.0478458
0	0.0478651
0	0.0478651
HDC	0.0478651
NPAT	0.0479004
---	0.0479595
MAP3K9	0.0479595
PTH1R	0.0479595
ATP6V1G2	0.048024
ICA1	0.048024
MAOB	0.048024
CD40	0.0481432
DNASE1L3	0.0481432
TPM2	0.0481432
RYR2	0.0481499
ECM1	0.0481499
CXCR3	0.0481854
SAA4	0.0482157
RHOF	0.0482168
OTUD4	0.0482319
SLC17A7	0.0482319
MAGEB2	0.0483347
---	0.0484062
NR1D1 /// THRA	0.0484422
ITGB3	0.0484422
PRIM2	0.0485149
CIC	0.0485149
ATF7IP2	0.0486036
IGHG1 /// LOC100290115	0.0486089
URB1	0.0486436
TDRKH	0.0486742
TSPYL2	0.0487266
MRE11A	0.0487414
---	0.0487946
A2BP1	0.0489443
LIMCH1	0.0489584
---	0.04905
GGTLC2	0.0490678
SMARCD3	0.0492193
C22orf26	0.0492382
0	0.0492382
RUNX1	0.0492382
CHRNA6	0.0494465
---	0.0495133
FLI1	0.0495133
ADH5	0.0496785
THRA	0.0496934
ARHGEF6	0.0498357
GPR75	0.0498526
MAF	0.0498881
GRIK5	0.0498881
C20orf29	0.0499314
NUCKS1	0.0499774
